# Supplementary material for: Distribution and cycling of terrigenous dissolved organic carbon in peatland-draining rivers and coastal waters of Sarawak, Borneo
Source: Copernicus journal article supplement (doi:10.5194/bg-15-6847-2018), 2018-11-16
Supplement: Supplementary file 1 [file Supplementary data table 1.xlsx]

## Sheet: Sheet1
Note: Station numbers are not always consecutive, some stations were sampled by other expedition participants but not sampled for DOM parameters. NA = missing value (some parameters were not measured at every station)
Expedition period	Cruise Identifier	Station	Region	River / Marine	End-member for conservative mixing model	Latitude	Longitude	Sampling date	Sampling time	Temperature	Salinity	Total suspended solids	Inorganic suspended solids	Chlorophyll-a	DOC	S275-295	S350-400	SUVA-254		Decadic absorption spectra (Absorbance m-1). Data have been corrected for NaN3 blanks but not baseline-corrected and not converted to Napierian absorption coefficient
						ºN	ºE	Local time	Local time	ºC, at 1 m	at 1 m	mg/L	mg/L	µg/L	µmol/L	per nm	per nm	L / (mg C) / m		Wavelength (nm):	250	251	252	253	254	255	256	257	258	259	260	261	262	263	264	265	266	267	268	269	270	271	272	273	274	275	276	277	278
March	Rajang cruise	1	Eastern Region	Rajang		2.1662	111.553	2017-03-04	10:32:00	27.7	0	388.8	362	0.38	NA	0.0130462	0.0179409	NA			10.5814	10.3926	10.211	10.0828	9.955	9.792	9.6472	9.5156	9.391	9.2614	9.1462	9.0674	8.9852	8.871	8.7698	8.591	8.4834	8.384	8.2962	8.2048	8.1154	8.0074	7.9014	7.8198	7.7384	7.652	7.5534	7.4614	7.3762
March	Rajang cruise	2	Eastern Region	Rajang		2.2488	111.755	2017-03-04	15:32:00	28.3	0	238.3	223	0.9	NA	0.01228	0.0172024	NA			5.9054	5.9496	5.971	5.9818	5.991	5.989	5.9832	5.9686	5.95	5.9244	5.8872	5.8614	5.8442	5.805	5.7678	5.681	5.6294	5.578	5.5312	5.4858	5.4384	5.3744	5.3074	5.2598	5.2184	5.17	5.1124	5.0534	5.0022
March	Rajang cruise	3	Eastern Region	Rajang		2.2048	111.915	2017-03-05	09:00:00	26.6	0	216.1	204	0.65	125.3	0.0118268	0.0171465	4.52902			6.7134	6.7806	6.825	6.8558	6.874	6.883	6.8862	6.8786	6.864	6.8384	6.8052	6.7794	6.7592	6.719	6.6778	6.579	6.5234	6.466	6.4142	6.3618	6.3084	6.2374	6.1644	6.1108	6.0614	6.005	5.9384	5.8754	5.8162
March	Rajang cruise	4	Eastern Region	Rajang	Rajang river end-member (mean of Stns. 4,5,6)	2.4274	111.84	2017-03-05	12:27:00	28.2	0	NA	NA	NA	176.6	0.0117546	0.0155239	4.83906			10.6514	10.6266	10.591	10.5618	10.521	10.457	10.3982	10.3286	10.261	10.1834	10.1042	10.0524	9.9982	9.908	9.8318	9.648	9.5574	9.468	9.3892	9.3058	9.2244	9.1204	9.0184	8.9388	8.8604	8.774	8.6774	8.5854	8.5012
March	Rajang cruise	5	Eastern Region	Rajang	Rajang river end-member (mean of Stns. 4,5,6)	2.4573	111.844	2017-03-05	13:02:00	26.9	0	212.3	199	0.6	201.1	0.0119195	0.0170183	4.69957			11.5514	11.5306	11.486	11.4528	11.405	11.331	11.2632	11.1876	11.112	11.0264	10.9392	10.8814	10.8192	10.719	10.6298	10.423	10.3204	10.224	10.1372	10.0428	9.9504	9.8354	9.7264	9.6388	9.5484	9.451	9.3444	9.2444	9.1502
March	Rajang cruise	6	Eastern Region	Rajang	Rajang river end-member (mean of Stns. 4,5,6)	2.3544	111.653	2017-03-06	17:43:00	27.7	0	216.9	203	0.63	174	0.0119526	0.0171906	4.52977			9.5974	9.5826	9.56	9.5398	9.509	9.459	9.4072	9.3526	9.299	9.2284	9.1592	9.1104	9.0622	8.983	8.9108	8.753	8.6684	8.585	8.5102	8.4328	8.3544	8.2564	8.1624	8.0878	8.0154	7.935	7.8444	7.7574	7.6772
March	Rajang cruise	7	Eastern Region	Rajang		2.3425	11.3662	2017-03-06	09:46:00	27.5	5.41	50	46	0.49	162.9	0.0143226	0.0181642	3.40755			6.7474	6.7456	6.728	6.7128	6.693	6.659	6.6232	6.5846	6.543	6.4914	6.4382	6.3964	6.3612	6.303	6.2458	6.137	6.0664	5.999	5.9362	5.8728	5.8074	5.7254	5.6444	5.5818	5.5224	5.457	5.3834	5.3104	5.2452
March	Rajang cruise	8	Eastern Region	Rajang		2.3525	111.354	2017-03-06	10:43:00	28	9.99	13.4	12	1.24	155	0.0146731	0.0176285	3.32495			6.3664	6.3246	6.278	6.2438	6.209	6.156	6.1072	6.0576	6.009	5.9504	5.8922	5.8504	5.8142	5.755	5.6998	5.596	5.5274	5.464	5.4042	5.3448	5.2854	5.2084	5.1314	5.0728	5.0204	4.959	4.8904	4.8224	4.7622
March	Rajang cruise	11	Eastern Region	Rajang		2.4335	111.282	2017-03-06	12:50:00	29.98	15	15.9	15	2.03	152.5	0.015053	0.0176313	3.31733			6.3244	6.2556	6.185	6.1408	6.091	6.027	5.9652	5.9046	5.848	5.7854	5.7212	5.6764	5.6372	5.575	5.5168	5.414	5.3454	5.279	5.2202	5.1588	5.1004	5.0224	4.9464	4.8878	4.8334	4.774	4.7054	4.6394	4.5782
March	Rajang cruise	12	Eastern Region	Marine		2.4576	111.244	2017-03-06	13:49:00	28.9	20.99	42.2	39	2.55	139.6	0.0144887	0.0164064	3.32003			5.9654	5.8446	5.731	5.6598	5.585	5.492	5.4112	5.3366	5.267	5.1914	5.1242	5.0764	5.0352	4.971	4.9138	4.818	4.7544	4.692	4.6392	4.5858	4.5324	4.4644	4.3964	4.3468	4.3014	4.25	4.1904	4.1334	4.0802
March	Rajang cruise	13	Eastern Region	Marine		2.4792	111.131	2017-03-06	15:30:00	30.1	30.1	7.5	7	2.81	96.2	0.0153214	0.0162853	2.37509			2.7304	2.7516	2.762	2.7688	2.769	2.769	2.7672	2.7576	2.748	2.7334	2.7092	2.6924	2.6832	2.665	2.6448	2.599	2.5714	2.54	2.5132	2.4878	2.4594	2.4244	2.3874	2.3578	2.3344	2.306	2.2714	2.2384	2.2092
March	Rajang cruise	14	Eastern Region	Rajang		2.1546	111.402	2017-03-06	18:24:00	29.5	27.63	NA	NA	NA	94.6	0.0170531	0.0168836	2.54535			3.2194	3.1126	3.017	2.9528	2.889	2.816	2.7552	2.6946	2.646	2.5914	2.5432	2.5084	2.4812	2.442	2.4058	2.35	2.3124	2.276	2.2442	2.2138	2.1834	2.1454	2.1074	2.0778	2.0514	2.022	1.9884	1.9564	1.9272
March	Rajang cruise	15	Eastern Region	Rajang		2.1381	111.254	2017-03-07	06:05:00	28.13	14.48	13.8	13	0.69	166.5	0.0148922	0.0177793	4.11671			8.4724	8.4296	8.376	8.3348	8.286	8.218	8.1552	8.0926	8.028	7.9524	7.8792	7.8254	7.7752	7.694	7.6188	7.479	7.3914	7.307	7.2302	7.1508	7.0714	6.9684	6.8704	6.7948	6.7184	6.635	6.5404	6.4504	6.3682
March	Rajang cruise	16	Eastern Region	Marine		1.8972	110.834	2017-03-07	09:57:00	30.4	29.91	0.8	1	0.62	83	0.0177786	0.0172176	2.49814			2.5714	2.5456	2.528	2.5098	2.491	2.469	2.4482	2.4236	2.401	2.3744	2.3432	2.3194	2.3002	2.274	2.2488	2.205	2.1744	2.145	2.1172	2.0908	2.0644	2.0294	1.9954	1.9658	1.9414	1.914	1.8824	1.8504	1.8222
March	Sebuyau cruise	1	NA	Sebuyau		1.4069	110.983	2017-03-11	09:33:00	27.66	0	NA	NA	0.27	1663.5	0.0125444	0.0166363	4.95106			98.85	99.775	99.45	99.575	99.675	99.55	99.4	98.775	97.875	97.05	96.125	95.325	95.15	95.1	94.525	92.55	91.275	90.45	89.2	88.4	88.05	86.5	85.45	84.75	83.975	82.875	82.175	81.15	79.975
March	Sebuyau cruise	2	NA	Sebuyau		1.4369	110.954	2017-03-11	11:23:00	27.54	0	6.4	5	0.33	1901.4	0.0111263	0.0160775	4.97447			116.156	115.572	115.022	114.608	114.162	113.52	112.942	112.314	111.692	110.932	110.28	109.85	109.272	108.512	107.76	105.6	104.724	103.86	103.064	102.158	101.252	100.1	99.07	98.25	97.332	96.326	95.284	94.23	93.294
March	Sebuyau cruise	3	NA	Sebuyau		1.4591	110.966	2017-03-11	11:48:00	27.77	0	71.4	63	0.33	1816.2	0.0120383	0.0163385	6.89129			152.25	152.375	151.35	151.075	150.975	150.45	149.6	148.975	147.775	145.75	144.525	143.425	143.35	142.6	141.725	139.05	137.075	135.85	134.3	133.1	132.45	130.3	128.45	127.55	126.175	124.975	123.375	121.95	120.575
March	Sebuyau cruise	4	NA	Sebuyau		1.5067	110.925	2017-03-11	12:03:00	27.93	0	24.5	NA	0.49	1967.8	0.0113234	0.0160734	5.48676			132.85	132.575	131.95	130.675	130.475	130.05	129.7	128.575	127.475	126.35	125.125	123.925	123.95	123.3	122.525	120.55	119.075	118.35	116.8	116.1	115.15	113.6	112.45	111.35	110.075	109.375	108.675	107.05	105.675
March	Sebuyau cruise	5	NA	Sebuyau		1.5192	110.925	2017-03-11	13:42:00	30.41	6.64	540.1	499	1.52	1116	0.0123666	0.0155115	4.6211			61.25	62.175	61.95	62.375	62.575	62.85	62.6	62.575	61.875	61.15	60.525	59.925	60.15	60.3	59.725	58.65	57.475	56.85	56.3	55.7	55.65	54.3	53.55	53.25	52.775	52.075	51.975	50.95	50.575
March	Sebuyau cruise	6	NA	Sebuyau		1.5194	110.932	2017-03-11	14:13:00	30.58	12.7	790.3	726	3.77	376.3	0.0132811	0.0170881	4.16676			19.236	19.182	19.082	18.968	18.882	18.79	18.702	18.534	18.392	18.222	18.01	17.87	17.802	17.682	17.56	17.21	17.034	16.82	16.664	16.498	16.352	16.09	15.85	15.69	15.542	15.356	15.204	15.03	14.824
March	Sebuyau cruise	7	NA	Sebuyau		1.5247	110.931	2017-03-11	14:47:00	30.2	13.52	32.6	27	2.48	334	0.0134901	0.017103	3.8717			15.926	15.882	15.812	15.658	15.612	15.53	15.442	15.344	15.212	15.072	14.86	14.71	14.652	14.572	14.43	14.18	14.044	13.87	13.704	13.578	13.432	13.27	13.07	12.93	12.792	12.646	12.514	12.33	12.194
March	Sebuyau cruise	11	NA	Sebuyau		1.5563	110.908	2017-03-11	11:19:00	29.6	10.66	216.7	200	2.5	378	0.0135168	0.0174795	3.95765			18.136	18.162	18.122	18.068	18.072	18.02	17.922	17.814	17.722	17.562	17.36	17.25	17.202	17.112	16.97	16.66	16.464	16.3	16.124	15.968	15.802	15.54	15.35	15.19	15.052	14.866	14.714	14.5	14.334
March	Sebuyau cruise	12	NA	Sebuyau		1.6012	110.879	2017-03-11	10:48:00	29.6	12.19	462.5	429	2.37	347	0.0128448	0.0174718	3.68766			14.6504	15.0056	15.291	15.4498	15.531	15.606	15.6552	15.6736	15.663	15.6244	15.5792	15.5324	15.4552	15.347	15.2498	14.781	14.6644	14.549	14.4292	14.3008	14.1684	14.0034	13.8534	13.7198	13.5804	13.432	13.2674	13.1154	12.9632
March	Sebuyau cruise	13	NA	Sebuyau		1.6745	110.832	2017-03-11	09:54:00	29.8	15.37	186.2	174	3.98	244.2	0.0146923	0.0177124	4.31031			12.406	12.562	12.592	12.628	12.662	12.66	12.632	12.604	12.482	12.362	12.23	12.16	12.132	12.062	11.99	11.74	11.594	11.46	11.334	11.188	11.102	10.92	10.7	10.64	10.522	10.406	10.264	10.1	9.954
March	Sebuyau cruise	14	NA	Sebuyau		1.7647	110.804	2017-03-11	09:00:00	28.7	23.51	78.5	73	0.98	206.1	0.0143155	0.017404	3.28102			7.9354	8.0366	8.108	8.1498	8.178	8.193	8.1932	8.1836	8.165	8.1284	8.0862	8.0544	8.0192	7.958	7.8988	7.766	7.6884	7.612	7.5402	7.4668	7.3914	7.2934	7.1954	7.1238	7.0474	6.965	6.8704	6.7824	6.6992
March	Maludam cruise	1	NA	Maludam		1.58576	111.084	2017-03-09	10:07:00	26	0	17.4	15	0.02	3648.6	0.0110025	0.0178931	4.9348			219.55	219.075	217.75	216.575	216.275	215.55	214.4	213.375	211.475	210.05	208.025	206.825	206.45	205.6	204.425	200.95	198.775	197.05	195.2	193.5	191.95	189.4	187.15	185.25	183.975	182.575	180.175	178.15	176.375
March	Maludam cruise	2	NA	Maludam		1.5956	111.077	2017-03-09	11:22:00	26	0	NA	NA	0.03	3759.5	0.0109398	0.0180501	4.99335			228.35	228.175	226.85	225.775	225.475	224.95	223.9	222.575	220.875	218.75	216.725	215.625	215.45	214.5	213.725	209.35	206.975	205.15	203.1	201.7	199.85	196.8	194.35	192.35	191.275	189.475	187.475	184.85	183.475
March	Maludam cruise	4	NA	Maludam		1.6158	111.062	2017-03-09	13:22:00	26.2	0	NA	NA	NA	4017.1	0.0109766	0.0177037	5.24499			259.15	258.175	256.35	253.975	252.775	251.65	250.6	248.975	246.975	245.05	242.025	239.825	239.55	239	237.025	233.25	230.975	228.75	226.4	224.4	222.75	220.2	217.35	214.95	213.275	211.275	209.175	207.15	204.675
March	Maludam cruise	5	NA	Maludam		1.6358	111.049	2017-03-09	14:02:00	26.4	0	NA	NA	0.06	4040.9	0.0113486	0.0176634	4.8597			237.55	237.875	236.75	236.275	236.075	235.45	234.7	233.375	232.075	229.95	227.925	226.425	226.25	225.6	224.225	220.05	217.575	215.65	213.4	211.5	209.95	207.2	204.55	202.65	200.775	198.775	196.775	194.75	192.575
March	Maludam cruise	6	NA	Maludam		1.6493	111.043	2017-03-09	14:56:00	26.5	0	NA	NA	0.04	4204.3	0.0109531	0.0175685	5.13164			263.15	262.675	261.15	259.875	259.375	258.35	257.5	255.975	253.875	251.75	249.625	247.925	247.35	246.5	245.525	241.05	238.475	236.05	233.7	232	230.05	226.8	224.25	221.95	220.375	218.375	216.075	213.25	211.375
March	Maludam cruise	7	NA	Maludam		1.6591	111.037	2017-03-09	15:45:00	26.8	0	35.9	33	0.23	4386.7	0.0106534	0.014096	1.42093			76.966	76.492	76.012	75.568	75.162	74.67	74.202	73.684	73.182	72.582	72	71.6	71.232	70.762	70.29	69.3	68.624	68.06	67.474	66.938	66.372	65.56	64.86	64.38	63.862	63.246	62.604	61.92	61.364
March	Maludam cruise	8	NA	Maludam		1.6632	111.025	2017-03-09	16:37:00	28	16.07	45	39	1.68	2922.4	0.010775	0.0152199	5.32577			189.35	189.675	188.55	188.075	188.075	187.35	186.5	185.675	184.275	182.45	180.525	179.325	179.15	178.9	177.725	174.45	172.575	170.85	169.2	168.1	167.15	164.7	162.65	161.45	160.275	158.775	157.375	155.95	154.175
March	Maludam cruise	9	NA	Maludam		1.6639	111.019	2017-03-09	16:51:00	29.2	20	348.7	323	3.11	265.8	0.0142475	0.0166911	3.9096			12.366	12.462	12.452	12.488	12.522	12.49	12.472	12.414	12.312	12.172	12.05	11.97	11.972	11.892	11.82	11.56	11.414	11.3	11.174	11.068	10.972	10.8	10.61	10.55	10.422	10.286	10.154	10.03	9.894
March	Simunjan cruise	1	NA	Simunjan		1.2846	110.841	2017-03-12	09:00:00	28.26	0	NA	NA	NA	2016	0.0114606	0.0165621	5.68975			144.2	142.8	141	139.5	138.4	137.2	136	134.5	133	131.3	130	128.7	128.2	127.4	126.3	123.9	122.6	121.2	120.1	118.9	117.9	116.3	115	113.9	112.6	111.9	110.1	109.7	108
March	Simunjan cruise	3	NA	Simunjan		1.1702	110.84	2017-03-12	11:30:00	27.89	0	NA	NA	NA	3039.3	0.0102674	0.0170126	5.02678			186.296	185.382	185.182	185.228	184.362	183.3	182.492	181.654	180.792	179.572	179.12	178.82	177.422	176.152	175.14	168.53	167.264	166.24	165.204	163.928	162.552	160.89	159.75	158.73	157.282	155.776	154.154	152.82	151.434
March	Simunjan cruise	4	NA	Simunjan		1.2229	110.814	2017-03-12	12:57:00	27.85	0	NA	NA	NA	2759.1	0.0119962	0.0172787	5.60313			190.55	189.975	188.25	187.675	186.775	185.35	184.2	182.675	180.875	178.75	177.125	175.625	175.05	174.3	172.925	169.45	166.975	165.15	163.8	162.3	160.55	158.2	156.65	154.75	153.175	151.575	149.575	148.15	146.175
March	Simunjan cruise	5	NA	Simunjan		1.3163	110.816	2017-03-12	14:00:00	28.59	0	NA	NA	NA	2605.2	0.0116361	0.0171707	5.74562			183.75	183.375	181.85	180.875	180.375	179.45	178.5	176.875	174.975	173.15	171.225	169.625	169.35	168.5	167.225	163.95	161.975	159.85	158.5	157.3	155.85	153.7	151.85	149.95	148.475	147.475	145.575	144.35	142.275
March	Sematan cruise	1	Western Region	Sematan	Sematan river end-member	1.7477	109.778	2017-03-09	10:25:00	26.5	0.14	4.1	3	0.33	239.6	0.0109712	0.0156577	5.15857			14.9194	14.9786	14.991	14.9918	14.962	14.896	14.8242	14.7496	14.67	14.5674	14.4742	14.4114	14.3342	14.211	14.1048	13.751	13.6314	13.521	13.4162	13.3018	13.1924	13.0534	12.9254	12.8218	12.7064	12.587	12.4544	12.3314	12.2142
March	Sematan cruise	2	Western Region	Sematan		1.779	109.784	2017-03-09	11:13:00	28.3	14.5	8.2	7	1.79	179.7	0.0127007	0.0154415	4.31867			9.4574	9.4426	9.413	9.3898	9.359	9.306	9.2562	9.1966	9.142	9.0734	9.0082	8.9614	8.9132	8.837	8.7648	8.609	8.5244	8.443	8.3682	8.2888	8.2114	8.1094	8.0094	7.9358	7.8574	7.773	7.6784	7.5874	7.5022
March	Sematan cruise	3	Western Region	Sematan		1.7856	109.764	2017-03-09	11:52:00	27.4	5.82	6.2	5	3.96	147.4	0.0128019	0.0160026	4.34848			7.7684	7.7906	7.783	7.7748	7.777	7.755	7.7122	7.6806	7.641	7.5764	7.5382	7.4834	7.4402	7.378	7.3148	7.213	7.1364	7.051	6.9972	6.9388	6.8644	6.7894	6.7024	6.6178	6.5614	6.499	6.3984	6.3584	6.2682
March	Sematan cruise	4	Western Region	Sematan		1.7836	109.784	2017-03-09	12:22:00	29	19	13.8	12	1.94	160.3	0.013448	0.0156232	3.57184			6.8364	6.8726	6.889	6.9018	6.905	6.897	6.8812	6.8596	6.837	6.8004	6.7602	6.7334	6.7062	6.658	6.6098	6.506	6.4444	6.383	6.3252	6.2678	6.2084	6.1294	6.0484	5.9928	5.9334	5.871	5.7954	5.7234	5.6572
March	Sematan cruise	5	Western Region	Sematan		1.7911	109.796	2017-03-09	13:03:00	29.8	27.2	14.5	13	1.54	99.5	0.0161163	0.0165698	2.59003			2.9434	3.0046	3.062	3.0998	3.128	3.157	3.1742	3.1846	3.192	3.1864	3.1742	3.1644	3.1622	3.15	3.1308	3.082	3.0544	3.022	2.9932	2.9638	2.9324	2.8884	2.8474	2.8158	2.7864	2.752	2.7114	2.6724	2.6352
March	Sematan cruise	6	Western Region	Sematan		1.8054	109.781	2017-03-09	13:25:00	29.53	28.04	25.4	23	1.56	118.5	0.0162637	0.0162514	2.5631			3.8924	3.8186	3.742	3.6998	3.654	3.594	3.5432	3.4936	3.45	3.4004	3.3532	3.3224	3.2972	3.257	3.2208	3.153	3.1114	3.069	3.0322	2.9948	2.9574	2.9094	2.8644	2.8298	2.7974	2.76	2.7184	2.6774	2.6392
March	Samunsam cruise	1	Western Region	Samunsam	Samunsam river end-member	1.9412	109.623	2017-03-11	11:36:00	27.3	0.36	3.7	3	0.1	1188	0.0102009	0.0146732	5.7501			84.056	83.632	83.242	82.808	82.372	81.93	81.462	81.014	80.502	79.912	79.38	78.92	78.552	78.082	77.63	76.54	75.874	75.26	74.684	74.098	73.512	72.73	72.02	71.47	70.942	70.316	69.644	68.94	68.374
March	Samunsam cruise	2	Western Region	Samunsam		1.9435	109.641	2017-03-11	12:12:00	29	9.92	48	43	2.31	706.9	0.0101046	0.0129146	5.84427			50.756	50.532	50.242	50.048	49.882	49.59	49.282	48.984	48.632	48.232	47.79	47.56	47.402	47.152	46.82	46.09	45.644	45.26	44.904	44.558	44.232	43.73	43.21	42.96	42.662	42.326	41.924	41.52	41.174
March	Samunsam cruise	3	Western Region	Samunsam		1.9441	109.643	2017-03-11	12:20:00	30.1	16.54	83.6	76	2.85	526.9	0.0103252	0.0131922	5.57519			36.166	36.002	35.742	35.508	35.342	35.1	34.912	34.664	34.392	34.092	33.69	33.51	33.412	33.252	33.06	32.52	32.194	31.89	31.634	31.398	31.172	30.8	30.4	30.2	30.032	29.756	29.454	29.17	28.914
March	Samunsam cruise	4	Western Region	Samunsam		1.9506	109.647	2017-03-11	08:24:00	30.48	23.25	81.8	74	4.99	226.7	0.0109053	0.0137395	4.51256			12.1034	12.2306	12.314	12.3538	12.366	12.369	12.3592	12.3346	12.302	12.2524	12.1982	12.1544	12.1062	12.031	11.9578	11.715	11.6304	11.544	11.4612	11.3748	11.2834	11.1704	11.0644	10.9768	10.8864	10.789	10.6794	10.5764	10.4752
March	Samunsam cruise	5	Western Region	Marine		1.9552	9.655	2017-03-11	10:33:00	29.9	26.54	20.3	18	3.13	158	0.0118001	0.014134	5.00303			9.5284	9.5496	9.561	9.5558	9.543	9.514	9.4822	9.4426	9.402	9.3484	9.2922	9.2504	9.2112	9.146	9.0848	8.932	8.8584	8.782	8.7132	8.6408	8.5664	8.4714	8.3814	8.3108	8.2374	8.158	8.0674	7.9834	7.9012
March	Samunsam cruise	6	Western Region	Marine		1.9664	109.663	2017-03-11	12:57:00	29.5	27.46	11.7	11	1.14	87.4	0.0155129	0.0162376	2.22386			1.8854	2.0626	2.205	2.2988	2.378	2.467	2.5362	2.5916	2.63	2.6624	2.6752	2.6804	2.6942	2.704	2.7028	2.671	2.6574	2.638	2.6182	2.5978	2.5754	2.5424	2.5104	2.4848	2.4614	2.433	2.4014	2.3684	2.3382
March	Samunsam cruise	7	Western Region	Marine		1.9379	109.666	2017-03-11	13:08:00	29.8	26.96	14.3	13	1.37	89.9	0.0151756	0.015748	3.16443			3.3014	3.3586	3.396	3.4208	3.441	3.458	3.4672	3.4696	3.469	3.4584	3.4392	3.4254	3.4192	3.403	3.3808	3.328	3.2974	3.264	3.2322	3.2028	3.1694	3.1254	3.0824	3.0508	3.0194	2.984	2.9444	2.9034	2.8662
March	Samunsam cruise	8	Western Region	Marine		1.8858	109.696	2017-03-11	13:28:00	30.58	26.82	6.3	6	0.62	93.3	0.0170752	0.016668	2.68632			2.9204	2.9676	3.002	3.0188	3.028	3.037	3.0442	3.0426	3.038	3.0264	3.0062	2.9884	2.9792	2.962	2.9418	2.89	2.8604	2.827	2.7962	2.7648	2.7324	2.6904	2.6504	2.6168	2.5864	2.551	2.5134	2.4744	2.4382
March	Samunsam cruise	9	Western Region	Marine		1.8635	109.717	2017-03-11	13:41:00	30.7	26.54	4.1	4	0.58	87.3	0.01762	0.0170121	2.39656			2.456	2.512	2.552	2.558	2.592	2.58	2.592	2.604	2.642	2.622	2.6	2.57	2.562	2.562	2.54	2.51	2.484	2.49	2.434	2.408	2.372	2.34	2.3	2.28	2.252	2.196	2.204	2.16	2.104
March	Samunsam cruise	10	Western Region	Marine		1.8404	109.753	2017-03-11	13:56:00	30.2	26.04	0.7	NA	0.42	94.6	0.0179487	0.0176389	2.56185			2.966	3.012	3.032	3.018	3.012	2.99	2.992	2.994	2.952	2.972	2.93	2.92	2.902	2.882	2.87	2.82	2.794	2.74	2.714	2.708	2.672	2.63	2.59	2.55	2.512	2.476	2.474	2.42	2.364
March	Talang islands cruise	1	Western Region	Marine		1.8081	109.78	2017-03-10	08:34:00	28	15.79	15.5	14	0.59	137.8	0.0131342	0.0156252	4.91881			8.0264	8.1046	8.163	8.1848	8.206	8.22	8.2242	8.2066	8.193	8.1554	8.1382	8.0994	8.0552	8.005	7.9368	7.823	7.7864	7.691	7.6412	7.5578	7.4714	7.4044	7.3194	7.2418	7.1714	7.109	7.0074	6.9504	6.8462
March	Talang islands cruise	2	Western Region	Marine		1.8483	109.77	2017-03-10	08:55:00	28.38	28.07	4.7	4	0.75	105.3	0.0161737	0.0156089	2.65572			3.4434	3.4436	3.443	3.4338	3.42	3.41	3.3952	3.3766	3.359	3.3354	3.3062	3.2794	3.2642	3.241	3.2148	3.158	3.1254	3.088	3.0542	3.0208	2.9874	2.9444	2.9014	2.8668	2.8344	2.799	2.7614	2.7204	2.6832
March	Talang islands cruise	3	Western Region	Marine		1.8752	109.769	2017-03-10	09:12:00	28.9	28.29	0.4	NA	0.31	98.2	0.0177386	0.017694	2.08186			2.2874	2.3596	2.414	2.4528	2.482	2.511	2.5292	2.5426	2.549	2.5464	2.5382	2.5334	2.5312	2.52	2.5068	2.465	2.4404	2.413	2.3882	2.3648	2.3384	2.3024	2.2644	2.2398	2.2124	2.184	2.1484	2.1144	2.0842
March	Talang islands cruise	4	Western Region	Marine		1.9313	109.827	2017-03-10	09:52:00	28.9	28.91	0.4	NA	0.29	93	0.0188628	0.0181034	2.16705			2.4974	2.4846	2.463	2.4428	2.429	2.41	2.3862	2.3626	2.342	2.3164	2.2862	2.2664	2.2512	2.229	2.2048	2.159	2.1274	2.098	2.0702	2.0438	2.0164	1.9814	1.9464	1.9188	1.8924	1.865	1.8324	1.8014	1.7712
March	Talang islands cruise	5	Western Region	Marine	Western region marine end-member	1.9164	109.775	2017-03-10	10:45:00	29.3	29.02	1.2	1	0.33	86.8	0.0191105	0.0182034	1.80387			1.7044	1.7806	1.844	1.8848	1.914	1.948	1.9722	1.9896	2.001	2.0064	1.9992	1.9934	1.9932	1.988	1.9798	1.945	1.9274	1.907	1.8842	1.8638	1.8414	1.8114	1.7834	1.7578	1.7354	1.709	1.6804	1.6514	1.6252
March	Talang islands cruise	6	Western Region	Marine		1.9299	109.737	2017-03-10	11:58:00	29.78	28.55	3.2	3	0.89	97.5	0.0174628	0.017006	2.18834			2.5194	2.5476	2.569	2.5838	2.592	2.598	2.6012	2.5986	2.594	2.5794	2.5602	2.5474	2.5402	2.524	2.5048	2.459	2.4334	2.404	2.3772	2.3508	2.3224	2.2864	2.2514	2.2238	2.1964	2.166	2.1324	2.0994	2.0672
March	Talang islands cruise	7	Western Region	Marine		1.9422	109.704	2017-03-10	12:18:00	29.4	28.66	3.7	3	0.91	97.2	0.0169587	0.0166867	2.4362			2.8834	2.8736	2.859	2.8488	2.84	2.819	2.8022	2.7796	2.762	2.7364	2.7072	2.6884	2.6742	2.649	2.6248	2.574	2.5424	2.509	2.4782	2.4518	2.4224	2.3834	2.3424	2.3138	2.2874	2.258	2.2214	2.1874	2.1552
March	Talang islands cruise	8	Western Region	Marine		1.9026	109.705	2017-03-10	12:37:00	29.5	28.35	5.1	4	0.72	105.9	0.0171922	0.0171713	2.31845			2.9944	2.9836	2.976	2.9728	2.963	2.947	2.9282	2.9096	2.891	2.8654	2.8382	2.8224	2.8082	2.783	2.7588	2.707	2.6724	2.64	2.6102	2.5818	2.5504	2.5094	2.4674	2.4408	2.4114	2.38	2.3424	2.3044	2.2722
March	Talang islands cruise	9	Western Region	Marine		1.8929	109.737	2017-03-10	12:58:00	29.2	28.47	0.5	NA	0.27	94.8	0.0179335	0.0180293	1.96768			1.9524	2.0636	2.151	2.2088	2.257	2.308	2.3452	2.3726	2.394	2.4044	2.4052	2.4054	2.4092	2.407	2.3978	2.362	2.3404	2.317	2.2952	2.2728	2.2494	2.2144	2.1784	2.1558	2.1294	2.101	2.0674	2.0344	2.0042
March	Talang islands cruise	10	Western Region	Marine		1.8575	109.737	2017-03-10	13:21:00	29.63	27.87	1	1	0.43	102.4	0.0165177	0.0166227	2.66396			3.4144	3.3896	3.349	3.3368	3.318	3.299	3.2332	3.2176	3.185	3.1474	3.1332	3.0874	3.0652	3.025	2.9958	2.959	2.9274	2.886	2.8502	2.8208	2.7874	2.7514	2.7044	2.6738	2.6374	2.598	2.5394	2.5554	2.4852
June	Coastal cruise June	1	Eastern Region	Marine		1.7414	110.87	2017-06-08	17:50:00	30.45	29.79	8.352	NA	NA	100.5	0.0165107	0.0167539	2.17498			2.622	2.6453	2.6608	2.6688	2.6745	2.6778	2.6753	2.6678	2.6583	2.6453	2.6235	2.6098	2.5988	2.5825	2.5605	2.5183	2.49	2.461	2.4348	2.4093	2.382	2.3483	2.3105	2.2858	2.2605	2.2323	2.1998	2.167	2.1375
June	Coastal cruise June	2	Eastern Region	Marine		1.84963	110.693	2017-06-08	20:15:00	29.93	30.63	11.964	NA	0.71	84.4	0.0212664	0.0168155	1.16872			1.181	1.1903	1.1948	1.2018	1.2045	1.2088	1.2093	1.2048	1.1993	1.1923	1.1805	1.1758	1.1718	1.1625	1.1515	1.1293	1.112	1.096	1.0818	1.0673	1.053	1.0363	1.0135	1.0008	0.9825	0.9673	0.9488	0.93	0.9145
June	Coastal cruise June	3	Eastern Region	Marine		1.74478	110.841	2017-06-09	09:15:00	30.6	28.67	112.88	NA	NA	108.6	0.0153125	0.0166995	2.41994			3.044	3.1073	3.1488	3.1738	3.1955	3.2198	3.2293	3.2348	3.2363	3.2283	3.2115	3.2018	3.1968	3.1785	3.1585	3.1113	3.081	3.048	3.0198	2.9923	2.962	2.9213	2.8765	2.8498	2.8195	2.7883	2.7488	2.71	2.6765
June	Coastal cruise June	4	Eastern Region	Marine		1.6591	110.71	2017-06-09	11:10:00	31.8	26.87	25.5933	NA	1.87	173.9	0.0142075	0.0145561	3.26922			6.921	6.9523	6.9638	6.9708	6.9655	6.9568	6.9383	6.9128	6.8843	6.8443	6.7995	6.7708	6.7428	6.6905	6.6385	6.5353	6.47	6.405	6.3478	6.2873	6.226	6.1473	6.0645	6.0078	5.9475	5.8793	5.8028	5.729	5.6595
June	Coastal cruise June	5	Eastern Region	Rajang		2.11713	111.296	2017-06-09	22:44:00	30.05	24.76	27.752	NA	1.2	140.6	0.0163214	0.0170694	2.84147			4.773	4.8083	4.8238	4.8338	4.8425	4.8428	4.8363	4.8248	4.8103	4.7863	4.7565	4.7378	4.7208	4.6865	4.6505	4.5793	4.53	4.48	4.4368	4.3903	4.343	4.2793	4.2125	4.1698	4.1215	4.0703	4.0088	3.95	3.8965
June	Coastal cruise June	6	Eastern Region	Rajang		2.19545	111.532	2017-06-10	12:30:00	28.7	0.09	72.39	NA	0.39	160.8	0.0137551	0.0173265	3.623			6.845	6.9343	6.9918	7.0198	7.0425	7.0608	7.0623	7.0548	7.0403	7.0153	6.9795	6.9518	6.9288	6.8855	6.8355	6.7313	6.67	6.602	6.5438	6.4813	6.42	6.3383	6.2525	6.1888	6.1285	6.0613	5.9798	5.907	5.8345
June	Coastal cruise June	7	Eastern Region	Rajang		2.28253	111.46	2017-06-10	13:26:00	29.48	2.87	37.7067	NA	NA	200.5	0.0150158	0.0173776	3.02594			7.233	7.2973	7.3398	7.3558	7.3615	7.3628	7.3543	7.3368	7.3133	7.2743	7.2275	7.1948	7.1608	7.1035	7.0475	6.9353	6.865	6.793	6.7268	6.6593	6.59	6.5013	6.4105	6.3438	6.2745	6.1963	6.1098	6.025	5.9475
June	Coastal cruise June	8	Eastern Region	Rajang		2.37587	111.455	2017-06-10	15:30:00	29.1	3.64	37.7333	NA	0.63	166.5	0.0150104	0.0178483	3.00936			5.919	5.9813	6.0248	6.0448	6.0605	6.0688	6.0693	6.0598	6.0453	6.0203	5.9835	5.9588	5.9358	5.8935	5.8485	5.7583	5.699	5.637	5.5828	5.5243	5.467	5.3913	5.3105	5.2568	5.1975	5.1343	5.0618	4.992	4.9275
June	Coastal cruise June	9	Eastern Region	Rajang		2.4379	111.271	2017-06-10	18:10:00	28.88	23.52	22.488	NA	1.67	118.9	0.0159746	0.0163834	2.25055			3.057	3.1443	3.2008	3.2348	3.2685	3.3018	3.3203	3.3328	3.3393	3.3383	3.3255	3.3178	3.3138	3.2985	3.2815	3.2323	3.203	3.169	3.1398	3.1113	3.08	3.0383	2.9905	2.9618	2.9295	2.8953	2.8538	2.814	2.7755
June	Coastal cruise June	10	Eastern Region	Marine		2.51878	111.144	2017-06-10	20:03:00	29.8	25.78	4.8	NA	1.03	129.4	0.0147691	0.0120575	2.65487			4.641	4.5973	4.5518	4.5158	4.4795	4.4348	4.3933	4.3488	4.3083	4.2593	4.2095	4.1738	4.1428	4.0985	4.0535	3.9813	3.93	3.875	3.8318	3.7883	3.753	3.7083	3.6555	3.6228	3.5945	3.5603	3.5198	3.478	3.4375
June	Coastal cruise June	11	Eastern Region	Marine		2.61767	111.017	2017-06-11	09:00:00	27.15	30.37	1.127	NA	0.7	92	0.0199875	0.0169473	1.14497			1.061	1.1503	1.2208	1.2648	1.3025	1.3488	1.3803	1.4048	1.4243	1.4383	1.4395	1.4418	1.4478	1.4495	1.4455	1.4253	1.413	1.399	1.3858	1.3713	1.356	1.3363	1.3135	1.2988	1.2815	1.2633	1.2428	1.221	1.2015
June	Coastal cruise June	12	Eastern Region	Marine		2.82662	111.248	2017-06-11	13:00:00	28.9	30.22	4.931	NA	1.45	90.4	0.0180419	0.0165941	0.940477			0.613	0.7733	0.9038	0.9877	1.0595	1.1448	1.2113	1.2638	1.3043	1.3393	1.3575	1.3668	1.3858	1.3985	1.4055	1.3923	1.389	1.378	1.3688	1.3603	1.349	1.3313	1.3105	1.2958	1.2825	1.2653	1.2458	1.228	1.2075
June	Coastal cruise June	13	Eastern Region	Marine		2.82227	111.255	2017-06-11	14:00:00	30.1	30.58	8.527	NA	2.58	82.5	0.0186092	0.0165666	1.13785			0.914	1.0023	1.0728	1.1148	1.1525	1.1998	1.2323	1.2568	1.2753	1.2903	1.2955	1.2968	1.3068	1.3075	1.3055	1.2883	1.28	1.268	1.2568	1.2443	1.234	1.2143	1.1955	1.1798	1.1675	1.1503	1.1318	1.115	1.0945
June	Coastal cruise June	14	Eastern Region	Marine		2.87458	111.642	2017-06-11	18:00:00	28.68	5.69	25.42	NA	0.35	209.3	0.0142857	0.0170729	3.13788			7.952	7.9663	7.9538	7.9448	7.9255	7.8948	7.8573	7.8158	7.7713	7.7173	7.6605	7.6188	7.5818	7.5125	7.4485	7.3213	7.245	7.166	7.0968	7.0233	6.951	6.8553	6.7625	6.6918	6.6195	6.5393	6.4498	6.367	6.2875
June	Coastal cruise June	15	Eastern Region	Marine		2.8749	111.638	2017-06-11	22:45:00	28.6	8.8	32.58	NA	NA	201.3	0.0139595	0.0163248	3.24408			7.953	7.9553	7.9398	7.9208	7.8995	7.8608	7.8183	7.7688	7.7233	7.6663	7.6085	7.5678	7.5278	7.4585	7.3955	7.2693	7.194	7.117	7.0498	6.9793	6.908	6.8163	6.7275	6.6578	6.5895	6.5133	6.4258	6.346	6.2675
June	Coastal cruise June	16	Eastern Region	Marine		2.87222	111.643	2017-06-12	08:00:00	27.1	21.1	12.504	NA	1.61	133.3	0.0149023	0.015551	2.62252			4.271	4.2753	4.2728	4.2618	4.2545	4.2418	4.2223	4.1998	4.1753	4.1453	4.1095	4.0858	4.0698	4.0385	4.0035	3.9383	3.899	3.852	3.8148	3.7763	3.739	3.6863	3.6295	3.5898	3.5565	3.5163	3.4668	3.421	3.3775
June	Coastal cruise June	17	Eastern Region	Marine		2.87815	111.453	2017-06-12	11:45:00	29.2	23.88	53.3	NA	2.79	112.2	0.0149014	0.016218	2.09007			2.377	2.5623	2.7028	2.7858	2.8665	2.9548	3.0223	3.0748	3.1103	3.1403	3.1465	3.1518	3.1628	3.1705	3.1645	3.1293	3.112	3.085	3.0618	3.0383	3.013	2.9773	2.9335	2.9038	2.8785	2.8473	2.8078	2.774	2.7365
June	Coastal cruise June	18	Eastern Region	Marine		2.79893	111.241	2017-06-12	13:10:00	28.5	30.71	7.928	NA	2.48	84.9	0.0199921	0.017084	1.00226			0.68	0.8143	0.9187	0.9838	1.0475	1.1178	1.1693	1.2118	1.2443	1.2703	1.2815	1.2898	1.3038	1.3145	1.3175	1.3033	1.298	1.285	1.2768	1.2643	1.254	1.2363	1.2155	1.1998	1.1855	1.1713	1.1498	1.131	1.1145
June	Coastal cruise June	19	Eastern Region	Marine		2.58932	111.201	2017-06-12	15:00:00	29.6	30.41	3.871	NA	NA	87	0.0205955	0.016577	1.45786			1.563	1.5573	1.5468	1.5368	1.5335	1.5248	1.5133	1.5008	1.4893	1.4733	1.4525	1.4408	1.4358	1.4225	1.4065	1.3783	1.36	1.337	1.3218	1.3033	1.286	1.2623	1.2385	1.2188	1.2035	1.1853	1.1608	1.142	1.1215
June	Coastal cruise June	20	Eastern Region	Marine		2.56292	111.248	2017-06-12	16:10:00	29.75	30.2	19.244	NA	2.75	92.8	0.0190846	0.0171081	1.4697			1.613	1.6353	1.6488	1.6538	1.6645	1.6728	1.6743	1.6728	1.6673	1.6603	1.6455	1.6358	1.6348	1.6245	1.6115	1.5823	1.565	1.543	1.5258	1.5083	1.491	1.4653	1.4395	1.4208	1.4025	1.3833	1.3578	1.336	1.3145
June	Coastal cruise June	21	Eastern Region	Rajang		2.42225	111.253	2017-06-12	18:30:00	29.5	20.7	35.688	NA	1.23	134.5	0.0151853	0.0149547	3.01988			5.087	5.05	5.002	4.967	4.9407	4.9007	4.8623	4.82	4.7767	4.7253	4.6733	4.642	4.6193	4.5813	4.5377	4.4563	4.4037	4.3513	4.306	4.2607	4.2147	4.1527	4.0887	4.0433	4.003	3.9557	3.8993	3.844	3.794
June	Coastal cruise June	22	Eastern Region	Rajang		2.4223	111.251	2017-06-12	23:00:00	29.5	19.01	174.612	NA	NA	148.9	0.0154327	0.0170514	2.74647			4.607	4.7383	4.8368	4.8988	4.9535	5.0038	5.0403	5.0618	5.0743	5.0743	5.0625	5.0538	5.0458	5.0245	4.9985	4.9233	4.881	4.832	4.7888	4.7433	4.698	4.6333	4.5635	4.5118	4.4675	4.4153	4.3518	4.293	4.2355
June	Coastal cruise June	23	Eastern Region	Marine		2.2069	111.138	2017-06-13	10:50:00	30.16	31.51	NA	NA	2.17	86.1	0.0197124	0.0169379	1.08148			0.775	0.9053	1.0158	1.0858	1.1485	1.2178	1.2733	1.3178	1.3483	1.3743	1.3845	1.3948	1.4088	1.4195	1.4215	1.4063	1.398	1.385	1.3748	1.3633	1.351	1.3313	1.3085	1.2918	1.2775	1.2613	1.2378	1.219	1.1995
June	Coastal cruise June	24	Eastern Region	Marine	Eastern Region marine end-member in June and March	2.1292	111.005	2017-06-13	12:45:00	30.4	32.05	1.91	NA	1.26	80.9	0.0228053	0.0170753	0.8611			0.571	0.6723	0.7597	0.8128	0.8615	0.9178	0.9623	0.9928	1.0183	1.0383	1.0455	1.0508	1.0608	1.0685	1.0655	1.0533	1.047	1.033	1.0238	1.0123	1.001	0.9833	0.9655	0.9498	0.9375	0.9233	0.9028	0.886	0.8685
June	Coastal cruise June	25	Eastern Region	Marine		1.96812	110.796	2017-06-13	14:45:00	31.2	31.08	5.634	NA	1.45	98.9	0.0189081	0.0174753	1.26269			1.072	1.2343	1.3758	1.4618	1.5385	1.6258	1.6953	1.7468	1.7863	1.8183	1.8335	1.8428	1.8578	1.8685	1.8695	1.8483	1.84	1.821	1.8068	1.7913	1.775	1.7473	1.7165	1.6978	1.6815	1.6613	1.6338	1.61	1.5835
June	Coastal cruise June	26	Eastern Region	Marine		1.7465	110.495	2017-06-13	19:20:00	31.04	31.79	5.033	NA	NA	100.4	0.0213096	0.017368	0.925683			0.795	0.9212	1.0228	1.0848	1.1455	1.2118	1.2633	1.3008	1.3313	1.3543	1.3635	1.3698	1.3818	1.3895	1.3895	1.3733	1.365	1.351	1.3398	1.3263	1.312	1.2913	1.2695	1.2518	1.2365	1.2173	1.1938	1.175	1.1535
September	Coastal cruise September	1	Eastern Region	Marine		1.72764	110.869	2017-09-04	17:21:00	29.635	30.7975	27.8648	25.6733	1.53798	107.632	0.0157992	0.0151579	1.82258			2.2632	2.3706	2.3502	2.3564	2.409	2.4372	2.445	2.43	2.439	2.4288	2.396	2.386	2.4006	2.3768	2.36	2.3526	2.309	2.2636	2.2412	2.2336	2.2062	2.1694	2.1418	2.1106	2.0968	2.0928	2.0354	1.9812	1.9822
September	Coastal cruise September	2	Eastern Region	Marine		1.96713	110.805	2017-09-04	19:49:00	29.5082	31.903	0.770412	0.602647	0.578417	NA	0.0176263	0.00757931	NA			2.1432	2.2596	2.2332	2.2334	2.291	2.2962	2.301	2.318	2.3	2.3058	2.276	2.266	2.2686	2.2578	2.244	2.1986	2.199	2.1666	2.1562	2.1236	2.1132	2.0984	2.0618	2.0486	2.0628	2.0328	1.9994	1.9892	1.9562
September	Coastal cruise September	3	Eastern Region	Marine	Eastern Region marine end-member	2.11376	110.805	2017-09-05	08:37:00	29.3542	31.6366	0.740412	0.506647	0.435735	82.718	0.0228489	0.0136727	0.959405			0.7892	0.9006	0.9262	0.9374	1.01	1.0352	1.072	1.089	1.091	1.1088	1.111	1.11	1.1226	1.1218	1.109	1.0746	1.087	1.0536	1.0472	1.0576	1.0212	0.9994	0.9618	0.9706	0.9708	0.9408	0.8984	0.8902	0.8822
September	Coastal cruise September	4	Eastern Region	Marine		2.32131	110.987	2017-09-05	11:20:00	29.2439	30.8344	0.560412	0.384647	0.600113	88.3492	0.0228242	0.0188573	1.33411			1.3762	1.4356	1.4192	1.4074	1.446	1.4572	1.445	1.451	1.433	1.4238	1.401	1.393	1.4126	1.3938	1.39	1.3416	1.339	1.3106	1.2982	1.2696	1.2472	1.2304	1.1858	1.1756	1.1848	1.1668	1.1194	1.0822	1.0762
September	Coastal cruise September	5	Eastern Region	Marine		2.43983	111.106	2017-09-05	13:27:00	30.0056	28.4436	9.12282	0.349294	2.64818	103.11	0.0182462	0.0169099	1.82245			2.2112	2.2946	2.2552	2.2294	2.291	2.3082	2.317	2.301	2.29	2.2708	2.232	2.236	2.2376	2.2308	2.192	2.1686	2.138	2.1066	2.0772	2.0646	2.0312	1.9994	1.9788	1.9346	1.9058	1.9068	1.8534	1.8092	1.8072
September	Coastal cruise September	6	Eastern Region	Rajang		2.41446	111.314	2017-09-05	15:54:00	29.3362	20.9361	8.68282	7.69329	1.89706	133.484	0.0164716	0.0168612	2.61097			4.1812	4.2546	4.2162	4.2014	4.232	4.2252	4.202	4.18	4.146	4.1418	4.087	4.054	4.0606	4.0208	3.998	3.9036	3.883	3.8416	3.7742	3.7586	3.6972	3.6244	3.5788	3.5516	3.5188	3.4628	3.4084	3.3482	3.2962
September	Coastal cruise September	7	Eastern Region	Rajang		2.35198	111.457	2017-09-05	19:15:00	27.5538	1.81033	75.5021	70.2282	0.129665	166.332	0.015469	0.0170696	2.8495			5.7962	5.8386	5.7812	5.7624	5.787	5.7552	5.722	5.689	5.634	5.6168	5.549	5.519	5.4946	5.4418	5.39	5.3006	5.263	5.1926	5.1352	5.0836	5.0302	4.9554	4.8838	4.8176	4.8048	4.7408	4.6544	4.6012	4.5472
September	Coastal cruise September	8	Eastern Region	Rajang		2.31856	111.673	2017-09-06	08:33:00	26.641	0.0255588	271.384	259.356	0.599989	164.626	0.0137645	0.015876	3.15281			6.4552	6.4846	6.3932	6.3264	6.317	6.2652	6.21	6.159	6.083	6.0408	5.975	5.927	5.8986	5.8468	5.799	5.6796	5.629	5.5826	5.5352	5.4676	5.4172	5.3664	5.2968	5.2426	5.2058	5.1568	5.0904	5.0202	4.9582
September	Coastal cruise September	9	Eastern Region	Rajang		2.24808	111.789	2017-09-06	11:17:00	26.8023	0.0253333	281.804	264.766	0.626402	NA	0.0144063	0.0177319	NA			5.2472	5.3176	5.2422	5.2294	5.252	5.2302	5.19	5.17	5.121	5.0758	5.027	5.01	5.0026	4.9538	4.897	4.8106	4.776	4.7116	4.6702	4.6166	4.5612	4.4984	4.4478	4.3996	4.3698	4.3188	4.2614	4.2002	4.1502
September	Coastal cruise September	10	Eastern Region	Rajang		2.23353	111.877	2017-09-06	16:55:00	26.7112	0.0255	242.284	230.596	0.764716	120.856	0.0140593	0.0162198	3.08318			4.4782	4.5506	4.5172	4.5244	4.543	4.5662	4.54	4.538	4.498	4.4848	4.444	4.423	4.4256	4.3878	4.376	4.2806	4.269	4.2046	4.1882	4.1436	4.1192	4.0564	4.0188	3.9606	3.9638	3.9188	3.8584	3.8092	3.7392
September	Coastal cruise September	11	Eastern Region	Rajang		2.4527	111.849	2017-09-07	07:57:00	26.55	0.02	174.534	163.686	0.369254	151.657	0.012942	0.015587	3.65851			6.9002	6.9556	6.9122	6.8984	6.909	6.8882	6.853	6.824	6.782	6.7338	6.661	6.654	6.6176	6.5668	6.533	6.4036	6.354	6.3036	6.2522	6.1896	6.1272	6.0594	5.9858	5.9306	5.8878	5.8138	5.7674	5.6932	5.6202
September	Coastal cruise September	12	Eastern Region	Rajang	Rajang river end-member (mean of Stn 12 and 13)	2.635	111.819	2017-09-07	10:42:00	26.8346	0.026	230.984	220.386	0.611293	246.449	0.0125681	0.0172151	4.08777			12.1852	12.2736	12.2282	12.1924	12.21	12.1782	12.12	12.049	11.985	11.8888	11.797	11.738	11.6746	11.5768	11.477	11.2496	11.148	11.0246	10.9162	10.8276	10.7342	10.6004	10.4798	10.3756	10.2788	10.1768	10.0444	9.9432	9.8382
September	Coastal cruise September	13	Eastern Region	Rajang	Rajang river end-member (mean of Stn 12 and 13)	2.80743	111.728	2017-09-07	13:29:00	27.2129	0.0280571	335.584	315.246	0.523	238.343	0.0129841	0.0170926	4.07282			11.8642	11.8946	11.7862	11.7494	11.731	11.6322	11.546	11.456	11.354	11.2758	11.188	11.124	11.0556	10.9378	10.839	10.6046	10.51	10.4066	10.3122	10.2206	10.1162	9.9964	9.8598	9.7766	9.6878	9.5898	9.4674	9.3442	9.2282
September	Coastal cruise September	14	Eastern Region	Marine		2.88584	111.646	2017-09-07	16:24:00	30.8003	29.2061	3.62541	2.93665	1.44466	97.7345	0.0185782	0.0166924	1.52989			1.5482	1.6816	1.7172	1.7644	1.832	1.8882	1.91	1.95	1.952	1.9868	1.962	1.964	1.9736	1.9658	1.959	1.9216	1.921	1.8946	1.8712	1.8556	1.8422	1.8044	1.7608	1.7566	1.7388	1.7308	1.6864	1.6542	1.6292
September	Coastal cruise September	15	Eastern Region	Marine		2.89357	111.447	2017-09-08	09:07:00	28.9599	26.4592	4.72941	4.26265	1.62391	97.9904	NA	NA	NA			NA	NA	NA	NA	NA	NA	NA	NA	NA	NA	NA	NA	NA	NA	NA	NA	NA	NA	NA	NA	NA	NA	NA	NA	NA	NA	NA	NA	NA
September	Coastal cruise September	16	Eastern Region	Marine		2.8911	111.467	2017-09-08	09:49:00	28.7605	18.5927	32.0968	29.3213	7.37756	136.47	0.0150447	0.0159528	2.64307			4.3212	4.4116	4.3662	4.3404	4.407	4.4112	4.402	4.376	4.365	4.3328	4.281	4.26	4.2486	4.2228	4.187	4.1346	4.071	4.0366	3.9972	3.9466	3.9062	3.8414	3.7958	3.7486	3.6958	3.6798	3.6164	3.5612	3.5262
September	Coastal cruise September	17	Eastern Region	Marine		2.84217	111.271	2017-09-08	11:47:00	29.8208	30.0558	30.8228	28.1893	5.26809	90.8235	0.0170747	0.0124435	1.93441			2.0352	2.1346	2.1362	2.1544	2.206	2.2282	2.242	2.252	2.235	2.2478	2.22	2.211	2.2346	2.2218	2.214	2.1706	2.164	2.1276	2.1042	2.0886	2.0712	2.0264	1.9948	1.9676	1.9858	1.9438	1.9064	1.8702	1.8402
September	Coastal cruise September	18	Eastern Region	Marine		2.59179	111.214	2017-09-08	14:50:00	29.4199	28.1827	7.45141	6.51065	2.07392	94.407	0.0171073	0.014533	2.09161			2.3352	2.4026	2.4112	2.4024	2.458	2.4872	2.487	2.489	2.464	2.4628	2.444	2.428	2.4266	2.4198	2.409	2.3646	2.34	2.3176	2.2992	2.2796	2.2552	2.2064	2.1718	2.1546	2.1258	2.1098	2.1004	2.0612	2.0212
September	Coastal cruise September	19	Eastern Region	Rajang		2.4219	111.251	2017-09-08	18:00:00	29.2441	21.4871	52.4348	48.4053	1.42938	133.228	NA	NA	NA			NA	NA	NA	NA	NA	NA	NA	NA	NA	NA	NA	NA	NA	NA	NA	NA	NA	NA	NA	NA	NA	NA	NA	NA	NA	NA	NA	NA	NA
September	Coastal cruise September	20	Eastern Region	Marine		2.48149	111.096	2017-09-09	09:53:00	28.9073	28.863	5.95041	5.38265	1.14392	91.8049	0.0187679	0.0180534	1.91936			2.1702	2.1866	2.1502	2.1074	2.138	2.1262	2.099	2.098	2.068	2.0428	2.017	1.987	1.9846	1.9608	1.967	1.9336	1.893	1.8616	1.8322	1.8176	1.8072	1.7514	1.7288	1.7306	1.6898	1.6628	1.6404	1.6292	1.5862
September	Coastal cruise September	21	Eastern Region	Marine		2.46933	111.04	2017-09-09	11:23:00	29.2225	31.1556	1.93341	1.49365	0.496408	81.6168	0.0185766	0.0136034	1.32435			1.0412	1.1986	1.2692	1.3054	1.399	1.4662	1.518	1.558	1.578	1.5968	1.588	1.584	1.6176	1.6088	1.627	1.5996	1.576	1.5606	1.5452	1.5466	1.5352	1.4914	1.4688	1.4726	1.4488	1.4298	1.4014	1.3852	1.3492
September	Coastal cruise September	22	Eastern Region	Marine		2.25161	111.074	2017-09-09	13:48:00	29.5365	29.697	4.28441	3.53065	1.47577	79.5267	0.0146611	0.0104802	4.31656			4.551	4.507	4.445	4.409	4.392	4.337	4.287	4.237	4.198	4.136	4.096	4.063	4.025	3.982	3.971	3.894	3.828	3.793	3.764	3.729	3.693	3.617	3.579	3.542	3.503	3.459	3.418	3.389	3.341
September	Coastal cruise September	23	Eastern Region	Marine		2.1214	111.083	2017-09-09	15:33:00	29.3591	31.142	15.3548	13.9993	2.05403	82.5936	0.0193301	0.0153983	1.49354			1.3322	1.4316	1.4652	1.4774	1.549	1.5952	1.619	1.637	1.646	1.6498	1.646	1.623	1.6406	1.6428	1.649	1.6206	1.595	1.5906	1.5592	1.5546	1.5352	1.4924	1.4848	1.4826	1.4628	1.4378	1.4224	1.3962	1.3632
September	Coastal cruise September	24	Eastern Region	Marine		2.13015	111.181	2017-09-09	16:44:00	29.7652	30.4664	30.8368	3.01129	2.06861	87.705	0.0175626	0.0152819	1.92349			1.8162	1.9456	2.0112	2.0254	2.099	2.1622	2.202	2.226	2.242	2.2408	2.232	2.228	2.2316	2.2278	2.237	2.2026	2.19	2.1646	2.1422	2.1346	2.1172	2.0694	2.0448	2.0346	2.0018	1.9838	1.9564	1.9422	1.8872
September	Coastal cruise September	25	Eastern Region	Marine		2.00751	110.957	2017-09-10	09:56:00	29.2923	30.7047	2.42541	1.81565	0.938171	78.3255	0.0230087	0.0205595	1.10566			0.8732	0.9626	0.9892	0.9954	1.066	1.1102	1.132	1.16	1.141	1.1678	1.163	1.151	1.1576	1.1558	1.182	1.1486	1.134	1.1286	1.1032	1.1066	1.0802	1.0734	1.0458	1.0386	1.0188	1.0048	0.9824	0.9652	0.9292
September	Coastal cruise September	26	Eastern Region	Marine		1.9544	110.898	2017-09-10	11:18:00	29.4948	31.3595	14.2428	12.5853	1.30158	76.0168	0.0226403	0.0186795	1.10269			0.8812	0.9586	0.9662	0.9794	1.037	1.0642	1.073	1.098	1.111	1.0988	1.091	1.076	1.0786	1.0738	1.112	1.0706	1.054	1.0396	1.0282	1.0326	1.0162	0.9814	0.9718	0.9686	0.9608	0.9348	0.9154	0.9102	0.8742
September	Sematan cruise September	1	Western Region	Marine		1.84165	109.762	2017-09-13	10:24:00	29.5622	32.2705	2.35909	1.86281	1.75913	87.4236	0.0218807	0.0182671	1.02988			1.085	1.076	1.093	1.103	1.099	1.087	1.085	1.082	1.073	1.061	1.049	1.038	1.032	1.019	1.008	0.98	0.962	0.946	0.933	0.915	0.899	0.8628	0.8549	0.8514	0.8468	0.8398	0.8297	0.8162	0.8037
September	Sematan cruise September	2	Western Region	Marine		1.87906	109.73	2017-09-13	11:25:00	30.065	32.3692	1.70717	1.35957	1.16789	83.1174	0.0242424	0.0190746	0.922631			0.973	0.951	0.953	0.95	0.939	0.92	0.909	0.898	0.885	0.868	0.855	0.843	0.834	0.819	0.807	0.781	0.764	0.748	0.735	0.718	0.704	0.6678	0.6629	0.6604	0.6578	0.6518	0.6447	0.6312	0.6217
September	Sematan cruise September	3	Western Region	Marine		1.89414	109.693	2017-09-13	11:55:00	30.3708	31.9733	2.92489	2.16786	3.68299	105.746	0.0202909	0.0180217	1.24335			1.622	1.604	1.606	1.603	1.594	1.574	1.564	1.553	1.538	1.519	1.5	1.487	1.478	1.459	1.442	1.409	1.386	1.364	1.346	1.323	1.304	1.2608	1.2469	1.2394	1.2318	1.2168	1.2007	1.1822	1.1657
September	Sematan cruise September	4	Western Region	Marine		1.95375	109.682	2017-09-13	12:33:00	30.4553	31.7619	2.15773	1.60092	3.06958	116.722	0.0169309	0.0164225	1.74056			2.501	2.477	2.472	2.466	2.455	2.43	2.414	2.394	2.375	2.352	2.326	2.308	2.298	2.273	2.251	2.207	2.177	2.148	2.123	2.096	2.071	2.0178	1.9959	1.9814	1.9698	1.9498	1.9267	1.9012	1.8767
September	Sematan cruise September	5	Western Region	Samunsam		1.95297	109.657	2017-09-13	13:13:00	29.684	24.9812	3.78057	2.43788	1.13426	652.793	0.0108275	0.013996	4.73187			38.19	37.92	37.55	37.39	37.22	36.94	36.66	36.32	36.03	35.4605	35.071	34.8515	34.662	34.3425	34.033	33.3835	33.014	32.6645	32.405	32.1155	31.836	31.4265	31.087	30.8475	30.628	30.376	30.042	29.76	29.476
September	Sematan cruise September	6	Western Region	Samunsam	Samunsam river end-member	1.94703	109.633	2017-09-13	14:14:00	26.5275	0.63934	10.3987	7.444	0.246062	1798.7	0.0109202	0.0159557	5.63735			124.55	124	123.15	122.4	122.1	121.4	120.75	119.85	119.05	117.75	116.6	115.8	115.65	115.1	114.45	112.6	111.6	110.45	109.588	108.637	107.637	106.425	105.25	104.45	103.525	102.7	101.612	100.575	99.575
September	Sematan cruise September	7	Western Region	Samunsam		1.95147	109.655	2017-09-13	15:32:00	28.037	7.08181	10.518	6.99216	0.412469	1252.52	0.0103531	0.0137619	5.40197			83.2	82.85	82.2	81.7	81.5	80.95	80.4	79.75	79.15	78.15	77.3	76.85	76.7	76.3	75.9	74.6	73.95	73.1	72.5875	71.9875	71.2875	70.525	69.8	69.3	68.725	68.15	67.7125	67.125	66.325
September	Sematan cruise September	8	Western Region	Samunsam		1.95178	109.66	2017-09-13	16:00:00	31.0126	26.9969	8.75765	5.83859	0.327112	1039.19	0.0105822	0.01406	5.23696			66.95	66.65	66.3	65.85	65.65	65.25	64.8	64.35	63.85	63.05	62.5	62	61.85	61.6	61.3	60.2	59.7	59.05	58.5875	58.1375	57.5375	56.975	56.5	56	55.525	55.1	54.6125	54.075	53.575
September	Sematan cruise September	9	Western Region	Marine		1.83358	109.779	2017-09-14	10:27:00	29.6601	32.2208	8.14165	6.67059	2.00671	86.7679	0.0204716	0.0177881	1.24755			1.357	1.339	1.328	1.318	1.312	1.292	1.28	1.267	1.251	1.234	1.214	1.201	1.194	1.177	1.162	1.134	1.113	1.094	1.079	1.06	1.043	1.0038	0.9929	0.9894	0.9848	0.9748	0.9627	0.9462	0.9347
September	Sematan cruise September	10	Western Region	Marine		1.86489	109.774	2017-09-14	11:04:00	29.8798	32.4513	1.03565	16.1038	1.13404	80.5812	0.0241221	0.0183576	0.945684			0.97	0.952	0.939	0.932	0.925	0.907	0.895	0.883	0.869	0.853	0.838	0.827	0.82	0.806	0.792	0.77	0.752	0.735	0.723	0.707	0.693	0.6578	0.6529	0.6514	0.6478	0.6428	0.6347	0.6222	0.6137
September	Sematan cruise September	11	Western Region	Marine	Western Region marine end-member	1.92653	109.803	2017-09-14	11:44:00	30.1011	32.584	0.540458	0.405163	0.601956	76.1776	0.0254384	0.0138317	0.809121			0.78	0.765	0.753	0.746	0.738	0.722	0.711	0.698	0.685	0.67	0.653	0.644	0.639	0.625	0.612	0.593	0.577	0.563	0.554	0.538	0.526	0.4928	0.4889	0.4904	0.4898	0.4858	0.4787	0.4692	0.4627
September	Sematan cruise September	12	Western Region	Marine		1.91589	109.774	2017-09-14	12:30:00	30.1351	32.5124	1.62601	1.28739	1.85125	77.7888	0.0248419	0.0179586	0.901086			0.885	0.873	0.864	0.856	0.852	0.837	0.828	0.819	0.806	0.792	0.775	0.766	0.761	0.747	0.735	0.713	0.696	0.681	0.67	0.654	0.643	0.6078	0.6029	0.6024	0.6008	0.5948	0.5887	0.5772	0.5677
September	Sematan cruise September	13	Western Region	Marine		1.91769	109.747	2017-09-14	14:11:00	30.6345	32.5576	1.11441	0.174647	1.08215	82.6108	0.0252859	0.0187738	0.810885			0.826	0.826	0.819	0.815	0.814	0.802	0.796	0.788	0.777	0.765	0.75	0.74	0.736	0.722	0.71	0.69	0.673	0.658	0.646	0.631	0.618	0.5828	0.5799	0.5794	0.5768	0.5708	0.5637	0.5502	0.5437
September	Sematan cruise September	14	Western Region	Marine		1.94392	109.667	2017-09-14	15:22:00	31.429	28.7768	3.51804	2.15549	1.76802	382.636	0.010863	0.0138273	4.48193			20.6	20.7	20.6	20.45	20.4	20.35	20.2	20.1	19.95	19.7	19.5	19.3	19.25	19.15	19.1	18.8	18.75	18.35	18.2875	18.0875	17.8375	17.725	17.75	17.55	17.275	17.1	17.0125	16.925	16.675
September	Sematan cruise September	16	Western Region	Marine		1.80783	109.932	2017-09-15	11:27:00	30.3348	31.0281	0.588854	0.411207	0.54459	100.995	0.0191833	0.0175827	1.69187			2.098	2.086	2.076	2.07	2.064	2.046	2.034	2.02	2.001	1.98	1.955	1.938	1.93	1.909	1.886	1.846	1.817	1.79	1.767	1.74	1.717	1.6648	1.6439	1.6324	1.6208	1.6008	1.5797	1.5552	1.5337
September	Sematan cruise September	17	Western Region	Marine		1.77706	109.928	2017-09-15	12:33:00	30.559	30.7263	1.24149	0.976471	0.721382	105.83	0.0187394	0.0175287	1.75647			2.322	2.294	2.269	2.251	2.239	2.21	2.188	2.167	2.144	2.118	2.088	2.069	2.057	2.031	2.009	1.965	1.935	1.905	1.881	1.852	1.827	1.7728	1.7509	1.7384	1.7248	1.7058	1.6817	1.6552	1.6327
September	Sematan cruise September	18	Western Region	Marine		1.74833	109.93	2017-09-15	13:06:00	30.5952	31.0386	1.43441	1.10365	0.790765	105.746	0.0188579	0.0174439	1.68251			2.206	2.187	2.167	2.152	2.142	2.118	2.099	2.081	2.06	2.036	2.007	1.99	1.979	1.955	1.932	1.892	1.862	1.834	1.811	1.782	1.759	1.7068	1.6859	1.6744	1.6608	1.6418	1.6187	1.5942	1.5717
September	Sematan cruise September	19	Western Region	Lundu		1.69433	109.923	2017-09-15	14:45:00	30.6008	15.0852	6.12103	5.21412	1.22461	303.828	0.0140503	0.0171699	3.38402			12.712	12.614	12.522	12.455	12.384	12.277	12.179	12.08	11.982	11.87	11.765	11.692	11.612	11.487	11.372	11.125	10.998	10.88	10.771	10.651	10.533	10.3698	10.2459	10.1494	10.0408	9.9218	9.7917	9.6672	9.5507
September	Sematan cruise September	20	Western Region	Marine		1.80181	109.824	2017-09-15	15:44:00	31.0867	32.3434	1.89039	1.4274	1.44925	88.6056	0.0217174	0.0167483	1.03875			1.151	1.137	1.124	1.115	1.108	1.09	1.077	1.064	1.049	1.031	1.013	1.001	0.994	0.978	0.963	0.938	0.918	0.901	0.888	0.868	0.854	0.8158	0.8099	0.8074	0.8018	0.7948	0.7847	0.7702	0.7587
September	Sematan cruise September	21	Western Region	Sematan	Sematan river end-member	1.75536	109.78	2017-09-16	09:24:00	26.622	3.39294	23.0521	17.8082	2.76792	402.784	0.0124613	0.0165103	4.10356			20.5	20.39	20.16	20.03	19.95	19.81	19.64	19.44	19.24	18.8505	18.521	18.3315	18.182	17.9625	17.753	17.3835	17.134	16.8945	16.735	16.5655	16.386	16.1665	15.977	15.7975	15.648	15.506	15.342	15.17	15.006
September	Sematan cruise September	22	Western Region	Sematan		1.78903	109.774	2017-09-16	10:13:00	27.6197	12.6297	41.0294	35.231	2.72741	206.644	0.0137375	0.016763	3.3955			8.633	8.58	8.529	8.49	8.447	8.382	8.324	8.265	8.202	8.131	8.065	8.018	7.969	7.892	7.824	7.678	7.597	7.517	7.448	7.371	7.294	7.1798	7.1029	7.0414	6.9788	6.9058	6.8237	6.7412	6.6647
September	Sematan cruise September	23	Western Region	Sematan		1.80567	109.783	2017-09-16	10:41:00	28.8616	28.9523	8.75765	7.43859	1.89996	151.34	0.0143976	0.0156183	2.48858			4.685	4.639	4.595	4.562	4.535	4.487	4.448	4.409	4.367	4.321	4.272	4.241	4.218	4.172	4.129	4.057	4.004	3.957	3.916	3.869	3.829	3.7538	3.7089	3.6814	3.6538	3.6178	3.5757	3.5312	3.4907
September	Maludam cruise September	1	NA	Maludam	Maludam river end-member (Mean of Stns. 1,2,3,4,5,6,10, and 1[Day2])	1.57347	111.09	2017-09-14	09:20:00	25.5	0.03	NA	NA	0.0375785	3217.2	0.0108206	0.0180031	5.1079			204.125	202.075	199.925	198.412	197.2	195.588	194.112	192.612	191.188	189.438	187.6	186.537	185.9	184.875	183.513	181.125	179.4	177.538	176.088	174.387	172.938	170.825	168.65	167.1	165.875	164.25	162.412	160.725	159.175
September	Maludam cruise September	2	NA	Maludam	Maludam river end-member (Mean of Stns. 1,2,3,4,5,6,10, and 1[Day2])	1.59085	111.08	2017-09-14	10:35:00	25.46	0.03	NA	NA	0.0421312	3137.98	0.0110748	0.0178355	5.30238			204.925	203.525	201.875	200.812	199.95	198.887	197.712	196.312	195.138	193.488	191.75	190.837	190.4	189.375	188.063	185.625	183.85	181.888	180.387	178.887	177.338	175.025	172.75	171.3	170.025	168.4	166.412	164.625	162.925
September	Maludam cruise September	3	NA	Maludam	Maludam river end-member (Mean of Stns. 1,2,3,4,5,6,10, and 1[Day2])	1.6059	111.069	2017-09-14	NA	NA	0.03	NA	NA	0.0335316	3279.61	0.0110262	0.0177754	5.08332			203.225	202.675	201.725	200.862	200.3	199.637	198.812	197.812	196.838	195.438	193.85	192.738	192.35	191.425	190.213	187.875	186.25	184.388	182.888	181.188	179.688	177.575	175.35	173.75	172.375	170.65	168.763	166.975	165.275
September	Maludam cruise September	4	NA	Maludam	Maludam river end-member (Mean of Stns. 1,2,3,4,5,6,10, and 1[Day2])	1.61563	111.062	2017-09-14	11:31:00	26.1	0.03	NA	NA	0.0657641	3245.2	0.0110933	0.0178079	5.17021			204.725	204.125	203.225	202.412	202.05	201.338	200.412	199.412	198.438	196.887	195.45	194.438	194.1	193.175	191.812	189.375	187.85	185.888	184.337	182.737	181.188	178.975	176.7	175.3	173.875	172.2	170.312	168.475	166.775
September	Maludam cruise September	5	NA	Maludam	Maludam river end-member (Mean of Stns. 1,2,3,4,5,6,10, and 1[Day2])	1.6358	111.049	2017-09-14	12:20:00	27.3	0.03	NA	NA	0.0336039	3136.38	0.0113154	0.0174977	5.41387			207.575	206.875	205.775	204.863	204.45	203.688	202.712	201.712	200.537	199.088	197.4	196.437	196.15	195.225	193.863	191.425	189.75	187.787	186.138	184.638	182.987	180.775	178.45	176.95	175.475	173.8	171.812	169.925	168.175
September	Maludam cruise September	6	NA	Maludam	Maludam river end-member (Mean of Stns. 1,2,3,4,5,6,10, and 1[Day2])	1.64592	111.046	2017-09-14	12:51:00	26.2	0.02	NA	NA	0.0908809	3153.99	0.0117012	0.0173803	5.11631			195.875	195.825	195.275	194.713	194.5	194.137	193.412	192.662	191.688	190.438	188.95	188.087	187.8	186.925	185.813	183.375	181.8	179.938	178.338	176.887	175.237	172.975	170.75	169.25	167.775	166.2	164.162	162.275	160.525
September	Maludam cruise September	10	NA	Maludam	Maludam river end-member (Mean of Stns. 1,2,3,4,5,6,10, and 1[Day2])	1.65922	111.037	2017-09-14	16:56:00	28	0.02	NA	NA	0.149773	3071.57	0.0112588	0.0161362	5.78508			218.275	217.575	216.275	215.312	214.75	213.787	212.662	211.463	210.188	208.588	206.7	205.737	205.35	204.275	202.912	200.375	198.6	196.588	194.988	193.387	191.837	189.425	187.15	185.65	184.175	182.5	180.412	178.475	176.725
September	Maludam cruise September	1	NA	Maludam (Day 2)	Maludam river end-member (Mean of Stns. 1,2,3,4,5,6,10, and 1[Day2])	1.65992	111.029	2017-09-15	09:41:00	26.3	0.04	NA	NA	0.13346	3326.81	0.0109093	0.0161807	5.69678			232.975	231.975	230.625	229.513	228.75	227.588	226.412	225.062	223.588	221.938	220	218.888	218.2	217.125	215.662	212.875	211.15	208.987	207.288	205.588	203.838	201.425	199.1	197.4	195.825	194.1	192.012	190.025	188.175
September	Maludam cruise September	2	NA	Maludam (Day 2)		1.66377	111.023	2017-09-15	09:57:00	26.15	4.91	NA	NA	1.09477	2242.65	0.0103905	0.0142666	5.4932			152.175	151.475	150.225	149.262	148.75	147.938	146.912	145.963	144.688	143.238	141.75	140.938	140.7	139.975	139.062	136.975	135.8	134.338	133.287	132.287	131.187	129.675	128.1	127.15	126.275	125.25	124.012	122.825	121.725
September	Maludam cruise September	3	NA	Maludam (Day 2)		1.66587	111.021	2017-09-15	10:05:00	25.05	10	NA	NA	1.61894	1543.34	0.0106965	0.0142009	5.06015			96.375	95.825	95.125	94.5125	94.25	93.7375	93.0125	92.3125	91.5375	90.5875	89.55	89.0875	88.9	88.475	87.9625	86.475	85.75	84.8375	84.0375	83.4375	82.8375	81.775	80.9	80.2	79.675	79	78.1625	77.425	76.725
September	Maludam cruise September	4	NA	Maludam (Day 2)		1.6667	111.021	2017-09-15	10:12:00	26.7	20	NA	NA	3.31227	356.527	0.0133176	0.0166415	3.908			16.9075	16.88	16.835	16.8275	16.8175	16.73	16.655	16.5625	16.4425	16.2625	16.0975	16.0825	16.0275	15.9175	15.795	15.51	15.3375	15.16	15.0375	14.885	14.7375	14.5	14.33	14.205	14.06	13.915	13.7125	13.5125	13.3975
September	Maludam cruise September	5	NA	Maludam (Day 2)	Marine end-member for Maludam	1.67977	111.005	2017-09-15	10:34:00	27.58	21	NA	NA	1.65614	319.732	0.0135672	0.0165049	3.52184			13.5975	13.64	13.595	13.5575	13.5475	13.54	13.485	13.4025	13.2925	13.1525	12.9975	12.9325	12.8975	12.8475	12.745	12.52	12.3675	12.23	12.1075	11.985	11.8775	11.72	11.58	11.445	11.34	11.205	11.0425	10.9125	10.7875
September	Maludam cruise September	6	NA	Maludam (Day 2)		1.66545	111.02	2017-09-15	10:52:00	27.23	14.81	NA	NA	3.46079	1265.56	0.0102421	0.01321	5.14092			80.6475	80.18	79.675	79.2775	78.9075	78.39	77.915	77.4325	76.9225	76.3425	75.7875	75.4225	75.0875	74.6075	74.115	73.01	72.4075	71.82	71.2875	70.745	70.1975	69.44	68.79	68.285	67.78	67.165	66.5025	65.8725	65.2875
September	Sebuyau cruise September	1	NA	Sebuyau		1.4392	110.954	2017-09-15	10:45:00	28	0.01	NA	NA	0.142185	2050.62	0.0118233	0.0162999	5.05584			127.175	126.875	126.225	125.562	125.4	124.888	124.312	123.562	122.787	121.788	120.45	119.837	119.65	119.175	118.462	116.725	115.7	114.338	113.388	112.388	111.487	110.125	108.6	107.65	106.775	105.75	104.462	103.275	102.275
September	Sebuyau cruise September	2	NA	Sebuyau		1.45915	110.964	2017-09-15	12:00:00	28.55	0.02	NA	NA	0.294083	2052.22	0.0119876	0.0165106	5.27202			131.825	131.775	131.225	130.762	130.65	130.238	129.762	129.112	128.338	127.287	126.15	125.487	125.4	124.775	124.062	122.275	121.2	119.888	118.837	117.787	116.787	115.175	113.75	112.8	111.725	110.65	109.213	107.925	106.825
September	Sebuyau cruise September	4	NA	Sebuyau		1.52075	110.933	2017-09-15	16:16:00	29.38	0.15	NA	NA	0.385617	2013.81	0.01073	0.0152723	5.07273			126.257	125.51	125.025	124.817	124.348	123.66	122.975	122.372	121.652	120.742	120.377	120.093	119.497	118.667	117.855	115.92	114.897	114.09	113.347	112.455	111.387	110.06	109.16	108.445	107.51	106.425	105.243	104.183	103.208
September	Sebuyau cruise September	5	NA	Sebuyau		1.53132	110.911	2017-09-15	15:58:00	30.2	10.23	NA	NA	2.26252	349.532	0.0138556	0.0170775	3.61147			15.925	15.875	15.825	15.7625	15.75	15.7375	15.6125	15.5125	15.2875	15.1375	15	14.8875	14.85	14.825	14.6625	14.375	14.3	14.0875	13.8875	13.7875	13.7375	13.475	13.3	13.3	13.125	12.95	12.6625	12.575	12.525
September	Simunjan cruise September	1	NA	Simunjan		1.29158	110.831	2017-09-17	10:55:00	27.6	0.02	NA	NA	1.1484	1960.21	0.0129296	0.0199197	4.1848			98.88	99.14	99.1767	99.3	99.28	98.97	98.6167	98.2533	97.7567	96.9467	96.3367	95.8467	95.33	94.4267	93.63	91.63	90.5533	89.4633	88.6167	87.5267	86.4933	85.18	84.06	83.1467	82.1733	81.0467	79.9667	78.78	77.9167
September	Simunjan cruise September	2	NA	Simunjan		1.16952	110.843	2017-09-17	12:53:00	28.4	0	NA	NA	3.82234	1918.6	0.0133937	0.0173376	4.70164			110.425	110.225	109.675	109.312	109.05	108.588	108.012	107.262	106.487	105.488	104.25	103.688	103.45	102.875	102.112	100.425	99.4	98.1375	97.0875	96.2375	95.2375	93.875	92.55	91.75	90.725	89.7	88.4625	87.375	86.275
September	Simunjan cruise September	3	NA	Simunjan		1.17025	110.84	2017-09-17	13:30:00	27.8	0	NA	NA	2.32333	1295.58	0.0136158	0.0181356	4.5143			71.325	71.275	71.025	70.7625	70.65	70.4375	70.1625	69.6625	69.0875	68.3875	67.6	67.0875	66.95	66.675	66.2125	65.025	64.3	63.4375	62.8375	62.1375	61.5375	60.625	59.75	59.2	58.575	57.9	57.0125	56.325	55.675
September	Simunjan cruise September	4	NA	Simunjan		1.2126	110.824	2017-09-17	14:48:00	27.8	0	NA	NA	1.36956	1276.9	0.0130711	0.0176212	4.90673			77.175	76.925	76.425	75.9625	75.8	75.3875	74.9625	74.3625	73.6875	72.8375	72	71.5875	71.35	71.025	70.3625	69.175	68.55	67.5875	66.9375	66.2375	65.5875	64.625	63.75	63.15	62.475	61.9	60.9625	60.325	59.575
September	Simunjan cruise September	5	NA	Simunjan		1.31887	110.809	2017-09-17	16:36:00	28.05	0	NA	NA	0.487028	1504.14	0.0124495	0.0173795	4.84288			89.9	89.34	88.6967	88.29	87.82	87.12	86.5667	85.9533	85.4267	84.6667	83.9467	83.5267	82.98	82.3567	81.68	80.08	79.3133	78.4733	77.8267	76.9967	76.3133	75.24	74.41	73.6867	72.9333	72.0867	71.1667	70.25	69.5967
September	Simunjan cruise September	6	NA	Simunjan		1.37848	110.743	2017-09-17	18:06:00	28.4	4.6	NA	NA	0.375785	924.848	0.012993	0.0174392	3.87251			44.05	43.84	43.4667	43.34	43.17	42.81	42.5767	42.2333	41.9667	41.4967	41.0367	40.8067	40.67	40.3967	40.06	39.24	38.7533	38.3933	37.9967	37.6067	37.2833	36.75	36.18	35.8467	35.6233	35.1167	34.6867	34.13	33.8367
[truncated: 622 more columns]
