# Supplementary figures and images for: Distribution and cycling of terrigenous dissolved organic carbon in peatland-draining rivers and coastal waters of Sarawak, Borneo
Source: Copernicus journal article supplement (doi:10.5194/bg-15-6847-2018), 2018-11-16

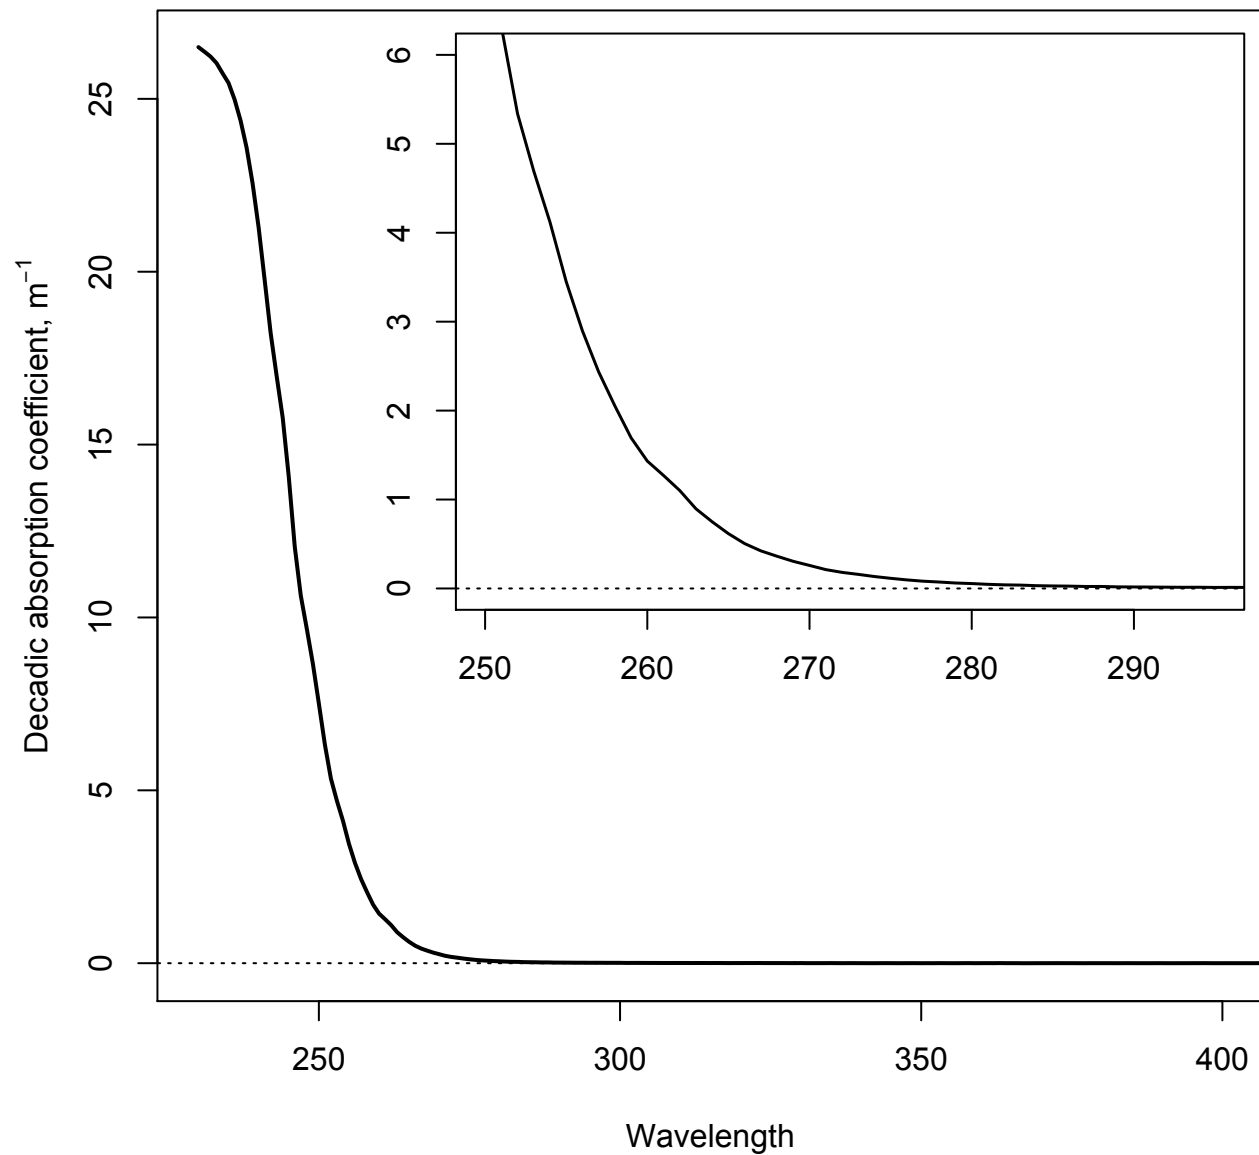

Supplement: Supplementary file 1 [file SI Fig. 1 sodium azide absorption blank.pdf › SI zip for submission/SI Fig. 1 sodium azide absorption blank.pdf]

— March — June — Sept

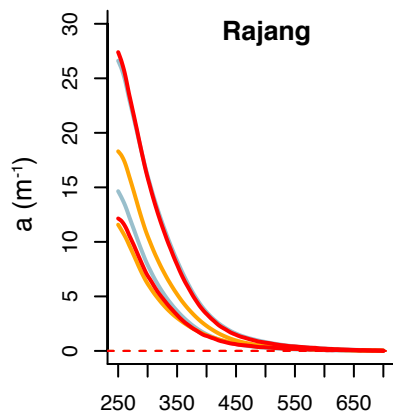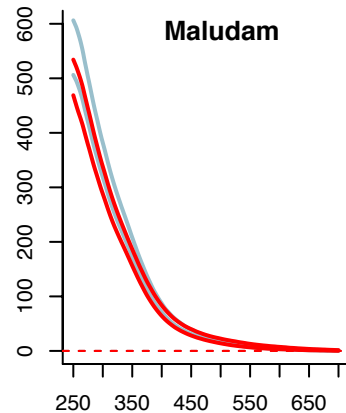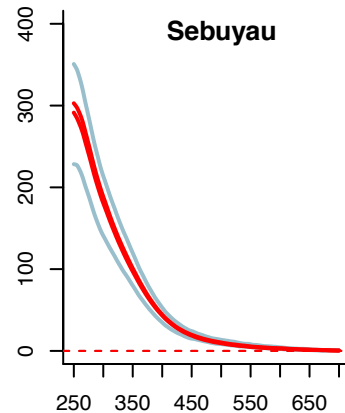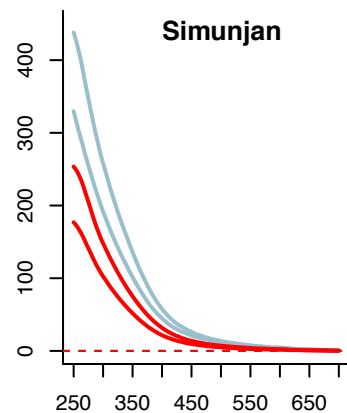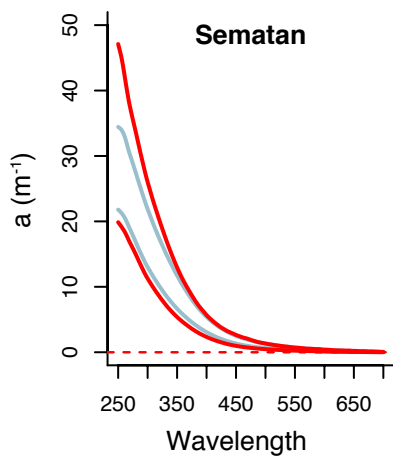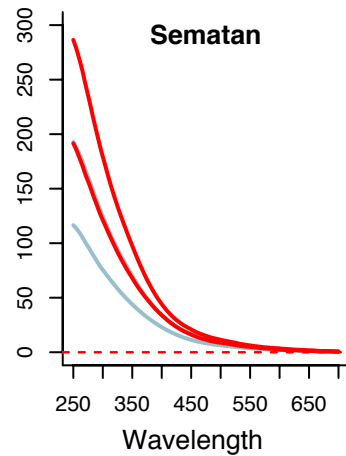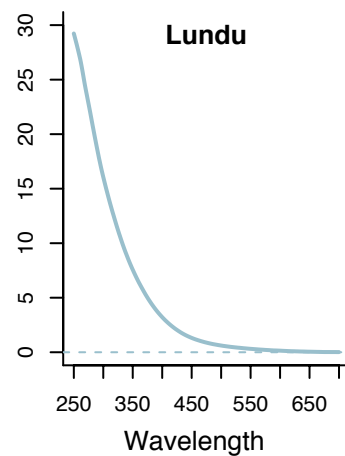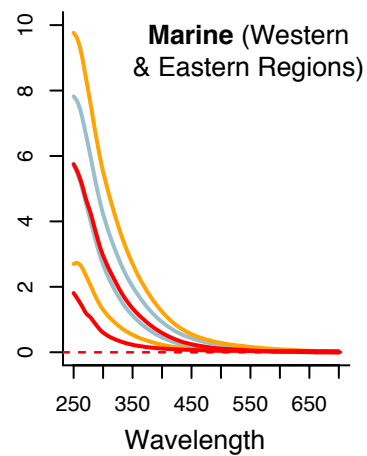

Supplement: Supplementary file 2 [file SI Fig. 2 CDOM spectra.eps.pdf › SI zip for submission/SI Fig. 2 CDOM spectra.eps.pdf]

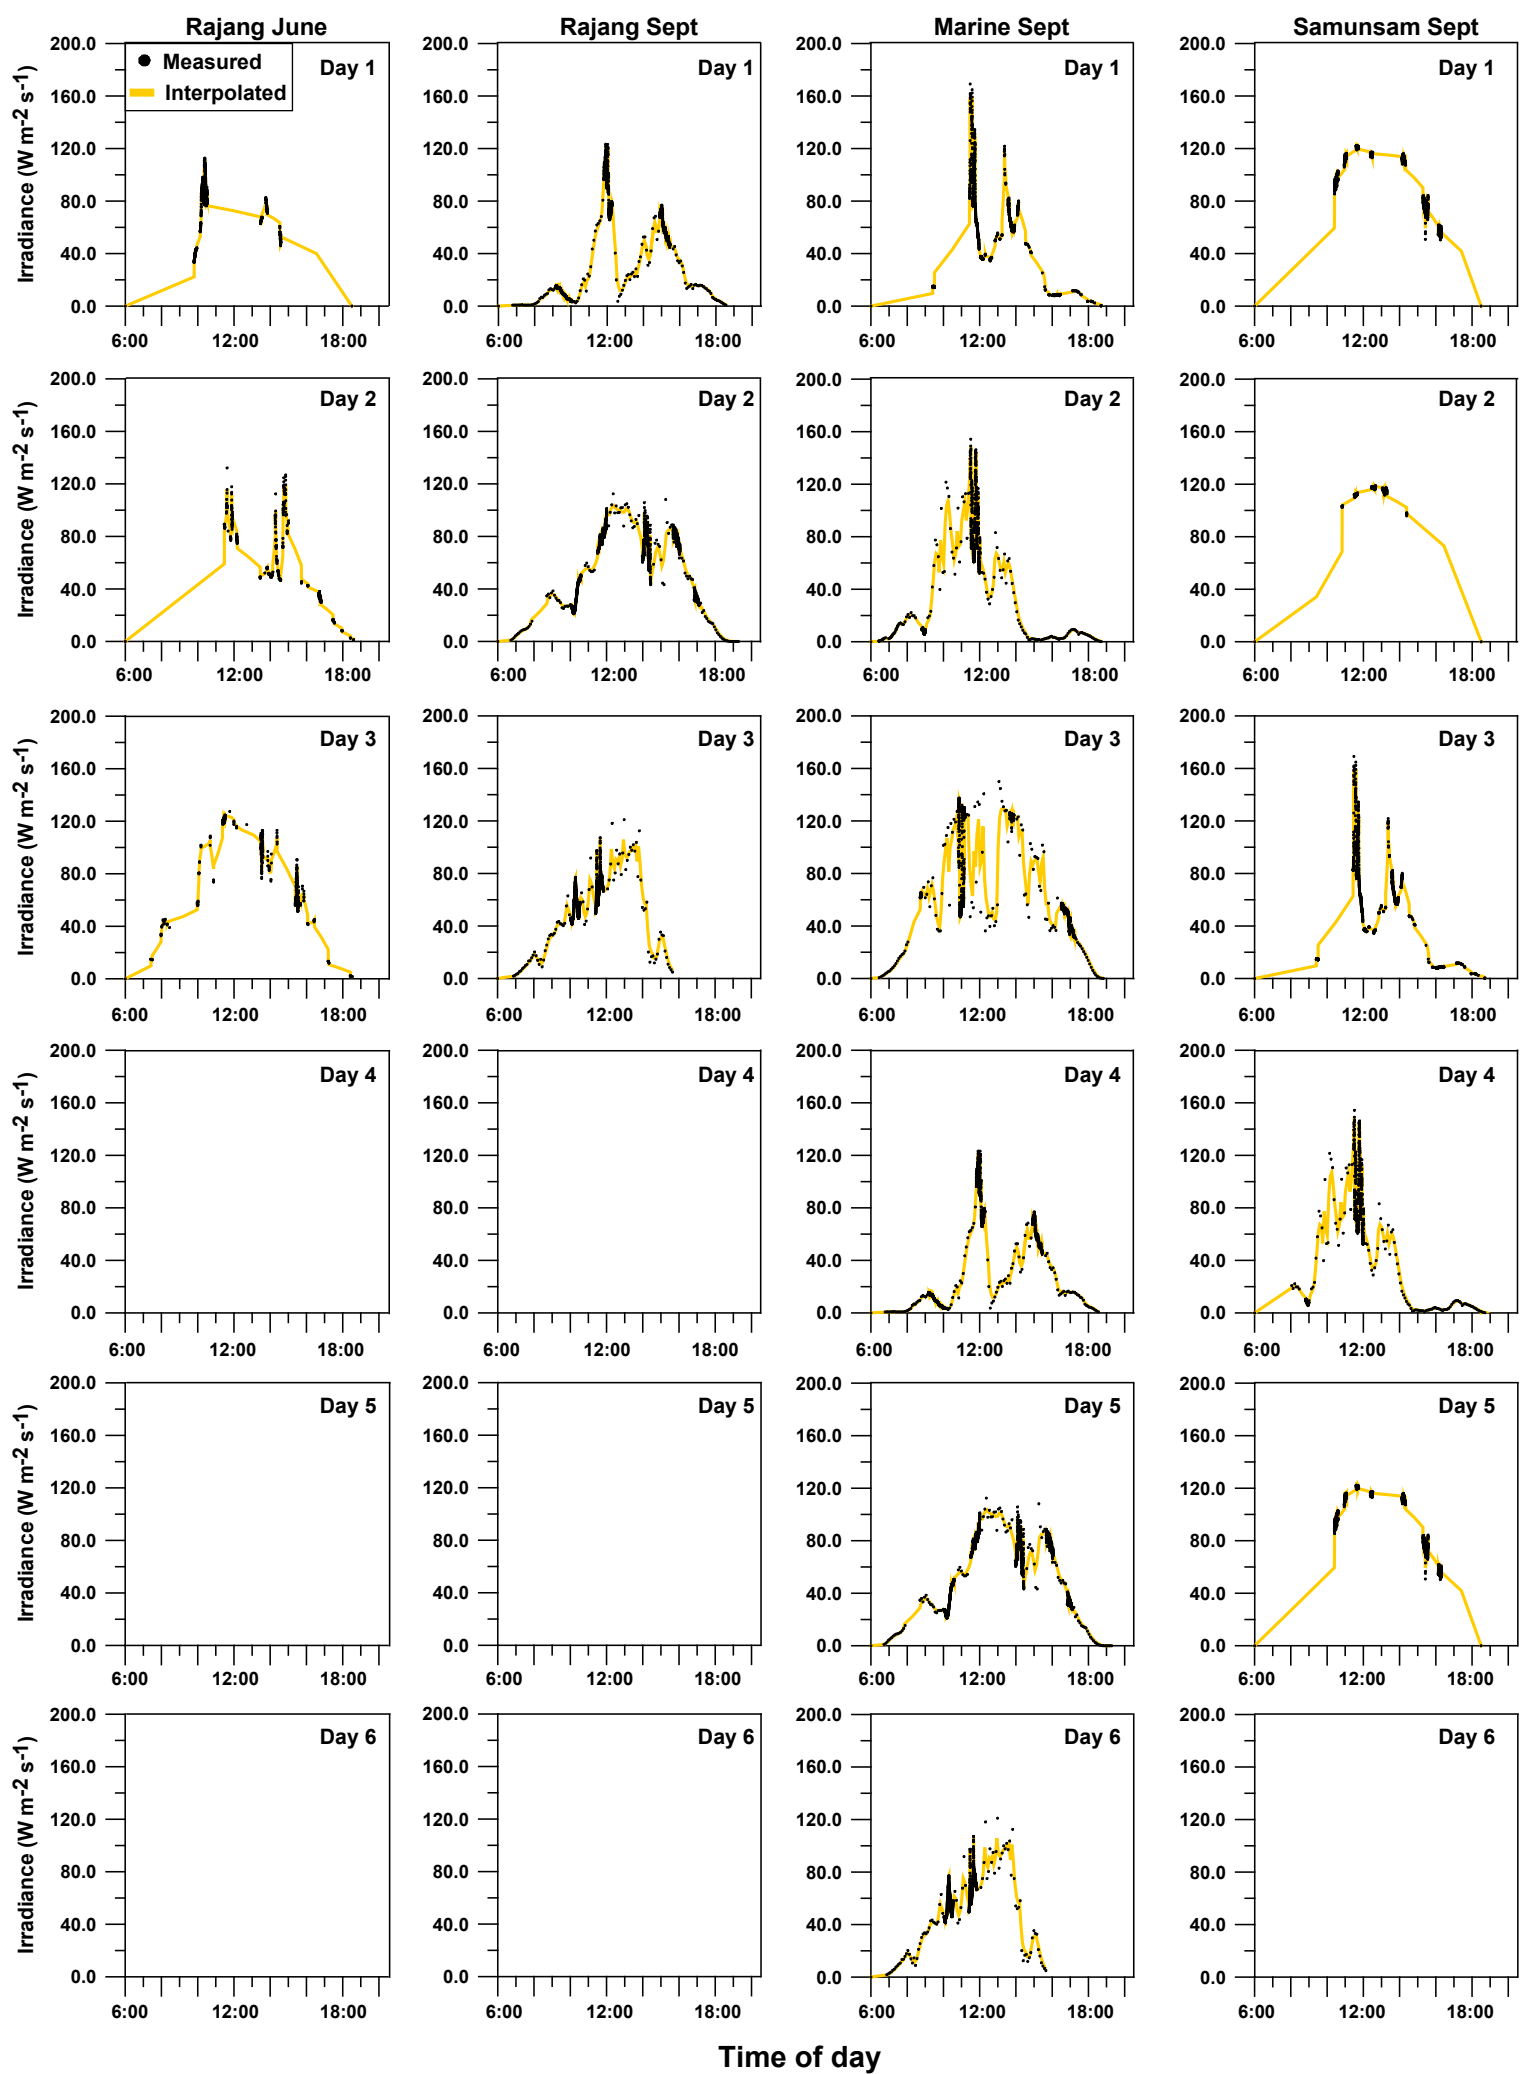

Supplement: Supplementary file 3 [file SI Fig. 3 small.pdf › SI zip for submission/SI Fig. 3 small.pdf]

Rajang June

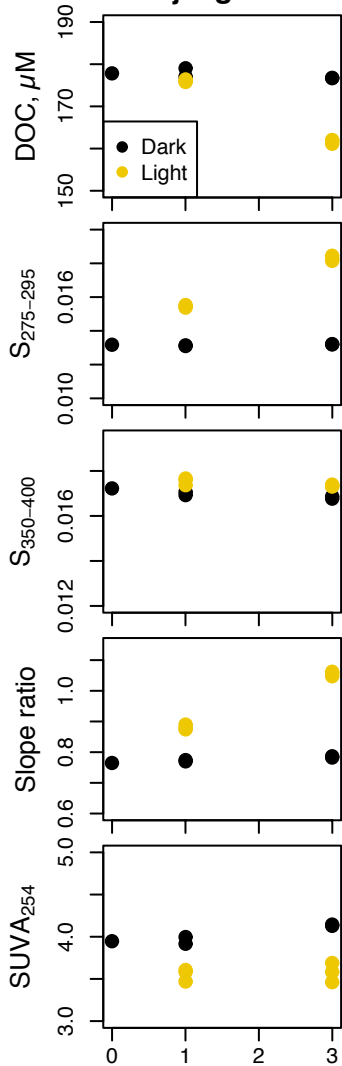

Rajang Sept

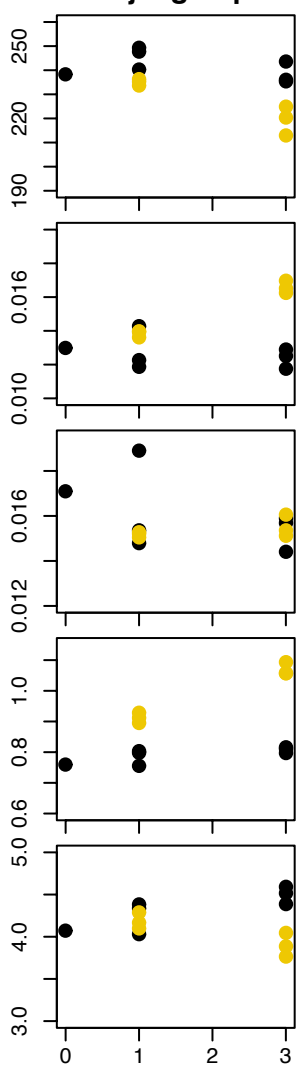

Marine Sept

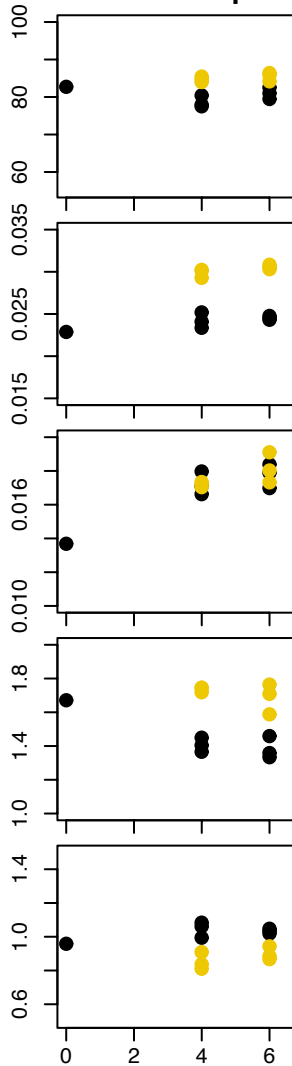

Samunsam Sept

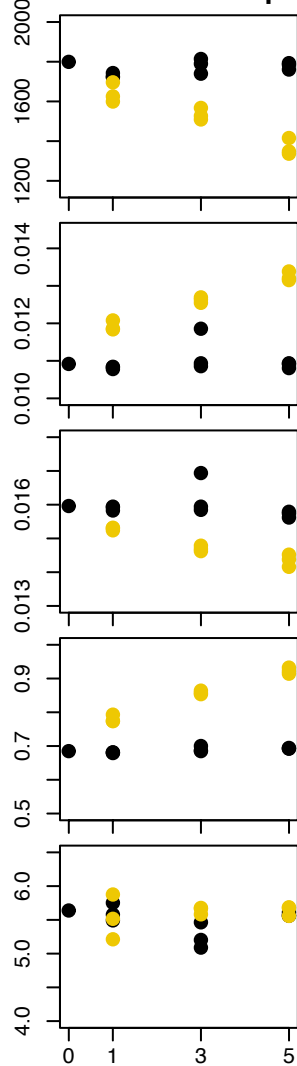

Days of sun exposure

Supplement: Supplementary file 4 [file SI Fig. 4 Photobleaching w days.pdf › SI zip for submission/SI Fig. 4 Photobleaching w days.pdf]
